1 **Meiosis-specific prophase-like pathway controls cleavage-independent**  
2 **release of cohesin by Wapl phosphorylation**

3  
4  
5 Kiran Challa<sup>1</sup>, Ghanim Fajish V<sup>1</sup>, Miki Shinohara<sup>1, 5</sup>, Franz Klein<sup>2</sup>, Susan M.  
6 Gasser<sup>3</sup> and Akira Shinohara<sup>1, \*</sup>

7  
8 <sup>1</sup>Institute for Protein Research, Graduate School of Science, Osaka University,  
9 Suita, Osaka 565-0871, Japan

10 <sup>2</sup>Max F. Perutz Laboratories, University of Vienna, A-1030 Vienna, Austria

11 <sup>3</sup>Friedrich Miescher Institute for Biomedical Research, 4058 Basel, Switzerland

12  
13  
14 <sup>5</sup>Present address: Kindai University, School of Agriculture

15  
16 Running title: Cleavage-independent release of meiotic cohesin

17 Key words: Cohesin, meiosis, prophase pathway, Rec8

18  
19 \*To whom correspondence should be addressed:

20 Akira Shinohara

21 Institute for Protein Research, Osaka University,

22 3-2 Yamadaoka, Suita, Osaka 565-0871 JAPAN

23 Phone: 81-6-6879-8624

24 FAX: 81-6-6879-8626

25 E-mail: [ashino@protein.osaka-u.ac.jp](mailto:ashino@protein.osaka-u.ac.jp)

26 ORCID: [0000-0003-4207-8247](https://orcid.org/0000-0003-4207-8247)

27

## 28 **Abstract**

29 Sister chromatid cohesion on chromosome arms is essential for the segregation  
30 of homologous chromosomes during meiosis I while it is dispensable for sister  
31 chromatid separation during mitosis. It was assumed that, unlike the situation in  
32 mitosis, chromosome arms retain cohesion prior to onset of anaphase-I.  
33 Paradoxically, reduced immunostaining signals of meiosis-specific cohesin,  
34 including the kleisin Rec8, from the chromosomes were observed during late  
35 prophase-I of budding yeast. This decrease is seen in the absence of Rec8  
36 cleavage and depends on condensin-mediated recruitment of Polo-like kinase  
37 (PLK/Cdc5). In this study, we confirmed that this release indeed accompanies the  
38 dissociation of acetylated Smc3 as well as Rec8 from meiotic chromosomes  
39 during late prophase-I. This release requires, in addition to PLK, the cohesin  
40 regulator, Wapl (Rad61/Wpl1 in yeast), and Dbf4-dependent Cdc7 kinase (DDK).  
41 Meiosis-specific phosphorylation of Rad61/Wpl1 and Rec8 by PLK and DDK  
42 collaboratively promote this release. This process is similar to the vertebrate  
43 “prophase” pathway for cohesin release during G2 phase and pro-metaphase. In  
44 yeast, meiotic cohesin release coincides with PLK-dependent compaction of  
45 chromosomes in late meiotic prophase-I. We suggest that yeast uses this highly  
46 regulated cleavage-independent pathway to remove cohesin during late  
47 prophase-I to facilitate morphogenesis of condensed metaphase-I  
48 chromosomes.

49

## 50 **Author Summary**

51 In meiosis the life and health of future generations is decided upon. Any failure in  
52 chromosome segregation has a detrimental impact. Therefore, it is currently  
53 believed that the physical connections between homologous chromosomes are  
54 maintained by meiotic cohesin with exceptional stability. Indeed, it was shown  
55 that cohesive cohesin does not show an appreciable turnover during long periods  
56 in oocyte development. In this context, it was long assumed but not properly  
57 investigated, that the prophase pathway for cohesin release would be specific to  
58 mitotic cells and will be safely suppressed during meiosis so as not to endanger  
59 the valuable chromosome connections. However, a previous study on budding  
60 yeast meiosis suggests the presence of cleavage-independent pathway of

61 cohesin release during late prophase-I. In the work presented here we confirmed  
62 that the prophase pathway is not suppressed during meiosis, at least in budding  
63 yeast and showed that this cleavage-independent release is regulated by  
64 meiosis-specific phosphorylation of two cohesin subunits, Rec8 and  
65 Rad61(Wapl) by two cell-cycle regulators, PLK and DDK. Our results suggest  
66 that late meiotic prophase-I actively controls cohesin dynamics on meiotic  
67 chromosomes for chromosome segregation.

68

## 69 Introduction

70 Meiosis gives rise to haploid gametes from diploid germ cells. During meiosis, a  
 71 single round of DNA replication is followed by two consecutive chromosome  
 72 segregations, meiosis I and II, which reduce the number of chromosomes by half  
 73 [1]. Homologous chromosomes are separated during meiosis I (MI), and sister  
 74 chromatids are segregated during meiosis II (MII). Sister chromatid cohesion  
 75 (SCC) acts as physical connection between the segregating chromosomes and  
 76 provides resistance to pulling forces by microtubules. SCC along chromosome  
 77 arms and at the kinetochore plays a critical role in chromosome segregation  
 78 during MI and MII, respectively. For accurate chromosome segregation at MI,  
 79 SCC along chromosome arms, and chiasmata, which are the cytological  
 80 manifestation of crossovers, are essential for generating tension between the  
 81 homologous chromosomes.

82 SCC is mediated by a protein complex, called cohesin, that is able to  
 83 embrace two sister chromatids in a ring-shaped structure [2]. The core subunits  
 84 of cohesin are composed of two structure-maintenance complex (SMC) ATPases,  
 85 Smc1 and Smc3, as well as a kleisin subunit, Scc1/Mcd1/Rad21 (hereafter, Scc1  
 86 for simplicity). Smc1 and Smc3, both of which consist of a rod-like structure with  
 87 an ATPase head, form a heterodimeric ring, which entraps two DNA duplexes.  
 88 Scc1 bridges between the Smc1 and Smc3 ATPase head domains to lock the  
 89 ring.

90 Chromosomal localization of cohesin is highly dynamic, and is strictly  
 91 regulated. During the G1 phase, the loading of cohesin is mediated by the  
 92 Scc2-Scc4 loader complex [3]. This process itself is not sufficient for SCC  
 93 formation. However, SCC establishment occurs in S phase, during which the  
 94 Eco1 acetyl-transferase catalyzes Smc3 acetylation [4-6]. SCC is thereafter  
 95 maintained until the onset of anaphase, when Scc1 is cleaved by the protease  
 96 separase [7]. This results in the release of the two entrapped sister chromatids.  
 97 Separase activity is regulated by the protein securin, which binds to separase to  
 98 inhibit its function. This process is closely monitored by the spindle-assembly  
 99 checkpoint (SAC) to ensure that each chromosome is properly attached to the  
 100 spindle apparatus prior to separation [1]. SAC negatively controls the protein  
 101 ubiquitination machinery, the anaphase-promoting complex/cyclosome (APC/C),



102 whose activation is essential for entry into anaphase. Activation of APC/C  
103 requires the Cdc20 and APC/C-Cdc20 targets securin for destruction, which in  
104 turn enables the separation of sister chromatids. Thus, the activity of Cdc20 plays  
105 a critical role in Scc1 cleavage, and consequently, the transition from metaphase  
106 to anaphase.

107 Cohesin dynamics are regulated by other cohesin-interacting proteins in  
108 yeasts and vertebrates, such as Scc3, Pds5 and Rad61/Wapl (Wapl), with  
109 vertebrates also having a Wapl antagonist called sororin [8]. Wapl, together with  
110 Pds5, negatively regulates the binding of cohesin to chromatin [9, 10].  
111 Wapl-regulated cohesin dissociation is independent of Scc1 cleavage, allowing  
112 entrapped DNAs to be released from the cohesin ring by opening the “exit gate”  
113 at the interphase between Smc3 and Scc1 [11, 12]. Eco1-mediated Smc3  
114 acetylation locks the gate [5, 13] and sororin interacts with the cohesin complex  
115 to suppress Wapl activity [8].

116 In vertebrate cells during late G2 or pro-metaphase, cohesin is removed  
117 from the majority of chromosome arms by a Scc1-cleavage-independent  
118 pathway [14]. This so-called “prophase pathway” for cohesin removal is triggered  
119 by the phosphorylation of sororin and Scc3 by polo-like kinase (PLK), aurora  
120 kinase, and cyclin-dependent kinase (CDK) [8, 15]. Phosphorylated sororin is  
121 inactive, and can no longer suppress Wapl activity. On the other hand, at  
122 kinetochores, the phosphorylation that triggers the prophase pathway is blocked  
123 by the action of Shugoshin, a protein that recruits a phosphatase, PP2A [16].  
124 PP2A is believed to dephosphorylate proteins involved in the prophase pathway,  
125 such as sororin. Interestingly, sororin is not present in lower eukaryotes such as  
126 budding yeast, and the prophase pathway of cohesin removal is absent in yeast  
127 mitosis [17].

128 Cohesin also plays an essential role in chromosome segregation during  
129 meiosis [1]. During meiosis, the kleisin Scc1 is replaced with its meiosis-specific  
130 counterpart, Rec8 (and also RAD21L in mammals) [18-20]. The Rec8-cohesin  
131 complex is also involved in various chromosomal events such as homologous  
132 recombination and chromosome motion in the meiotic prophase-I [21, 22].  
133 Cohesin is a major component of the chromosome axis, which contains two sister  
134 chromatids organized into multiple chromatin loops [19]. During the pachytene

135 stage, homologous chromosomes pair with each other, and synapse along  
136 chromosome axes to form a unique meiosis-specific chromosome structure, the  
137 synaptonemal complex (SC) [23]. The SC together with chromosome axes then  
138 dismantle to form chiasmata during diplotene and diakinesis/early metaphase-I.  
139 At the onset of anaphase-I, APC/C-Cdc20 induces securin degradation, which  
140 activates separase to allow cleavage of Rec8. Phosphorylation of Rec8 by three  
141 kinases, PLK, Dbf4-dependent Cdc7 kinase (DDK), and Casein kinase 1 (CK1)  
142 promotes this cleavage [24, 25]. Upon the onset of anaphase-I, the  
143 phosphorylation and cleavage of Rec8 is restricted to chromosome arms, while  
144 Rec8 at the kinetochores is protected by Shugoshin [26]. It has been shown that  
145 Shugoshin blocks phosphorylation of Rec8 at the kinetochores by recruiting  
146 PP2A [27, 28]. Protection of SCC at the kinetochores is essential for proper sister  
147 chromatids segregation at MII.

148 Previously, Yu and Koshland (2005) analyzed the role of condensin, a  
149 related SMC complex that is required for chromosome condensation in mitosis,  
150 for the resolution of recombination-dependent linkage between homologous  
151 chromosomes. Their immuno-staining showed a decreased intensity of  
152 Rec8-cohesin signal on meiotic chromosomes during late prophase I relative to  
153 mid-prophase I. The decreased Rec8 signals were also seen in a separase  
154 mutant defective in Rec8-cleavage (*esp1-1*) as well as a cell arrested prior to  
155 anaphase I. These results suggested that a subset of Rec8-cohesin is released  
156 from meiotic chromosomes during late prophase I, as in vertebrate mitosis.  
157 Importantly, this Rec8 release required the condensin-dependent recruitment of  
158 Cdc5/PLK to the chromosomes. However, the Cdc5 target involved in  
159 Rec8-release during meiosis remained unidentified, even though the study  
160 suggested a potential role for Rec8 phosphorylation in the pathway. Their  
161 proposed role for Cdc5/PLK in Rec8 dynamics remained a bit controversial [24,  
162 25, 29]. A recent study in *C. elegans* indicated a role for condensin in the  
163 “retention” of meiotic cohesin complexes on meiotic chromosomes at least during  
164 early- and mid-prophase I by antagonizing Wapl activity [30].

165 Here, we revisited the question of Rec8-cohesin dynamics during late  
166 prophase-I and confirmed that, in late prophase-I of budding yeast,  
167 approximately half of the full-length of Rec8 molecules are released from meiotic

168 chromosomes in a cleavage-independent manner [31]. In addition to Cdc5/PLK,  
169 we showed that this “prophase-like” removal of cohesin during meiotic prophase-I  
170 requires Rad61/Wpl1 and DDK. Furthermore, we found that not only DDK- and  
171 PLK-mediated phosphorylation of Rec8, but also meiosis-specific  
172 phosphorylation of Rad61/Wpl1 promotes Rec8-cohesin release. The Rec8  
173 release is coupled to changes in chromosome compaction. We propose that  
174 cleavage-independent release of cohesin is a key regulator of meiotic  
175 chromosome function in late prophase-I.

176

## 177 **Results**

178

### 179 **Rec8 shows dynamic localization during late prophase-I**

180 Here we studied the dynamics of axis proteins during late prophase-I. Because  
181 late-prophase I is a very short-lived stage in budding yeast meiosis (e.g. Fig. 1G;  
182 ~1.5 h from mid-pachytene and post-meiosis I in wild-type cells), we arrested  
183 cells prior to the onset of anaphase I using a meiosis-specific depletion mutant of  
184 *CDC20*, *cdc20mn* (meiotic null), which compromises activation of the anaphase  
185 promoting complex/cyclosome (APC/C) [32]. We then analyzed the localization  
186 of chromosome axis proteins in this *cdc20mn* mutant over a meiotic time course.  
187 The staining of a central component of the SC, Zip1 [33], allowed us to classify  
188 stages of prophase-I as follows: I, dotted staining; II, short-line staining; III,  
189 long-line staining. Category III corresponds to pachytene stage, during which  
190 chromosome synapsis occurs. Following pachytene stage, the SC dismantles,  
191 resulting in the re-appearance of dotted Zip1 staining (class-I), some of which  
192 co-localizes with kinetochores (see below) [34]. Disassembly of Zip1 was also  
193 found to correlate with dissociation of chromosome axis proteins such as Red1  
194 (Fig 1A and 1B)[35].

195 We observed long lines of Zip1 staining peaks at 5 h in *cdc20mn* mutants,  
196 followed by the appearance of Zip1 dots after 6 h (Fig 1A and 1B). When  
197 localization of Rec8 was analyzed in pachytene stage, Rec8 shows linear  
198 staining that co-localized with Zip1-lines (Fig 1A). Following the pachytene stage,  
199 chromosome spreads with Zip1 dots (i.e. at 6 h) started to exhibit altered Rec8  
200 staining associated with discontinuous dots (Fig 1A). This indicated that the

201 remodeling of cohesin localization takes place at or after SC disassembly.  
202 Discontinuous dots of Rec8 staining in the *cdc20mn* mutants accumulated for up  
203 to ~8 h. The appearance of discontinuous Rec8 staining occurred concomitantly  
204 with disassembly of SCs into Zip1-dots (Fig 1B). To further characterize the  
205 disassembly status of the axes, we also examined Rec8-Red1 localization at  
206 later time points; chromosomal Red1 signals diminish with a conversion from  
207 long lines to short lines/dots when discontinuous Rec8 staining is observed (Fig  
208 1A and 1B). This result further confirmed that Rec8 remodeling occurs at or after  
209 disassembly of chromosome axis.

210 We then used super-resolution microscopy to analyze Rec8-cohesin  
211 localization on meiotic chromosomes at high resolution. A structural illumination  
212 microscope (SIM) was used to determine Rec8 localization in *cdc20mn* and  
213 *ndt80*, which arrests at the pachytene stage [36](Fig 1D). At 5 h, both strains  
214 showed two parallel lines of Rec8, which corresponded to two axes of full length  
215 SCs (Fig 1D). More importantly, by SIM the two Rec8 lines do not show a uniform  
216 staining, but rather a beads-on-string-like staining was observed. This suggested  
217 non-continuous localization of Rec8-cohesin along the chromosome axis.  
218 Kinetochore visualization by staining of Ctf19, a centromere protein, showed that  
219 each SC harbored a single focus of Ctf19, indicating tight fusion of all four sister  
220 kinetochores. Two linear Rec8 patterns were fused at the Ctf19 focal point,  
221 suggesting a unique axial structure at peri-centromeric regions with respect to  
222 Rec8-cohesin localization. In the *ndt80* mutant, these two Rec8 lines are  
223 maintained beyond 6 h. On the other hand, differential staining patterns were  
224 observed between 5 h and 8 h in *cdc20mn* mutants; the two clear parallel lines  
225 visible at 5 h disappear at 8 h, at which point discrete focus or short-line staining  
226 of Rec8 dominate. This is consistent with the observations made by conventional  
227 fluorescent microscopy described above. At later time points in *cdc20mn* mutants,  
228 a Ctf19 focus at kinetochores is often flanked by two distinct Rec8 signals (Fig 1D,  
229 see inset).

230 A previous study reported that the signal intensity of HA-tagged Rec8 was  
231 diminished during late prophase-I in *cdc20mn* as well as in wild type cells [31].  
232 However, they did not observe the discontinuous Rec8 staining at late stages and  
233 instead a uniform staining of reduced intensity was seen. This may be due to

234 differences in the antibodies used. In the previous study, the localization of  
235 HA-tagged Rec8 was examined using an anti-HA antibody. In our study,  
236 localization of non-tagged Rec8 was examined using two independent anti-Rec8  
237 antisera. We quantified Rec8 signals on chromosomal spreads, and also found  
238 reduced Rec8 signal at 8 h ( $61.9 \pm 9.8\%$ ) as compared with that at 5 h in *cdc20mn*  
239 mutants (Fig 1E). This confirmed previous observations of HA-Rec8 [31]. This  
240 was also supported by quantification of Rec8 signal in our SIM images (Fig 1E).  
241 While epitope masking might also explain the decreased Rec8 signal, our results  
242 support the previous suggestion that Rec8 dissociates from chromosomes during  
243 late prophase-I [31]. Given that the decrease in Rec8 intensity was observed in  
244 *CDC20* depletion cells arrested at the meta/anaphase transition, Rec8  
245 remodeling appeared to be independent of separase-mediated cleavage.

246 Because *CDC20* depletion may affect Rec8 localization during prolonged  
247 arrest, we confirmed Rec8 remodeling in late prophase-I by performing Rec8 and  
248 Red1 co-staining in a wild-type meiosis (Fig 1F and 1G). We examined spreads  
249 at 5 and 6 h when ~70% cells are still in prophase-I, classifying these as  
250 Red1-positive and Red1-negative spreads, which correspond with  
251 pachytene/zygotene stages and diplotene/prometaphase-I, respectively. We  
252 then checked the staining pattern of Rec8 and its intensity. As seen upon *CDC20*  
253 depletion, the Red1-positive spreads showed linear Rec8 staining patterns (Fig  
254 1F). On the other hand, Red1-negative spreads contained discontinuous dots of  
255 Rec8. This staining was different from that in anaphase-I spreads, which show  
256 two separated Rec8 foci with centromere clustering (Fig 1F, 7 h). Intensity  
257 measurements confirmed that Red1-negative spreads had reduced Rec8 signal  
258 ( $52.7 \pm 11.9\%$  [ $n=20$ ]) compared to Red1-positive spreads ( $100 \pm 15.1\%$ ; Fig 1H).  
259 Thus, Rec8 remodeling occurs during late prophase-I in normal wild-type meiosis  
260 as well.

261 To make sure that Rec8 depletion is independent of its cleavage, the  
262 localization of a Rec8 mutant protein, Rec8-N, which is resistant to cleavage by  
263 separase, was also investigated [37]. The *REC8-N* mutant strain shows normal  
264 prophase I progression, but is completely blocked at the metaphase/anaphase-I  
265 transition because Rec8-N is resistant to separase cleavage [37]. Similar to the  
266 *cdc20mn* mutant, at late prophase-I the *REC8-N* mutant exhibited discontinuous

267 Rec8 staining with reduced intensity ( $60 \pm 15.7\%$ ), while linear staining was  
268 observed at 5 h (Fig 1I and 1J). Consistent with this, a previous study reported  
269 that the temperature-sensitive separase-deficient mutant, *esp1-1*, also showed a  
270 decrease in Rec8 intensity at late prophase-I at a restricted temperature [31].  
271 Together, all observations support the hypothesis that Rec8 localization is  
272 remodeled and possibly released in late meiotic prophase-I in a manner  
273 independent of Rec8 cleavage.

274

### 275 **Rec8 dissociates from meiotic chromosomes at late prophase-I**

276 To check whether Rec8-cohesin is indeed released from meiotic chromosomes in  
277 *cdc20mn* mutants, we fractionated cell/nuclear lysates to separate the chromatin  
278 bound and unbound fractions. Chromatin bound fractions contained proteins  
279 tightly bound to chromosomes, such as histones. At 5 h, most full-length Rec8  
280 protein was recovered in the chromatin-bound fraction containing histone H2B in  
281 both *ndt80* and *cdc20mn* mutants (Fig 2A and S1A Fig). This argues that Rec8,  
282 and thus the cohesin complex, is tightly bound to DNA and/or chromatin. Rec8 is  
283 also chromatin-bound at 8 h in *ndt80* cells. On the other hand, a large proportion  
284 of Rec8 protein ( $66.0 \pm 15.7\%$ ) was recovered in the soluble fraction at 8 h in the  
285 *cdc20mn* mutant, and the remaining Rec8 protein was in the chromatin fraction  
286 (Fig 2A and 2B). Interestingly, the unbound Rec8 migrated more slowly on the gel  
287 than the bound Rec8. Rec8 is a target of Dbf4-dependent Cdc7 kinase (DDK),  
288 Polo-like kinase (Cdc5), and casein kinase 1 (Hrr25), and its slow-migrating form  
289 is highly phosphorylated [24, 25]. Its phosphorylation is believed to promote Rec8  
290 cleavage by the separase, Esp1 [24, 25]. Importantly, Yu and Koshland (2005)  
291 showed that cohesin release is connected with Cdc5- and condensin-dependent  
292 phosphorylation of Rec8. Our results suggested that Rec8 phosphorylation  
293 triggers cohesin dissociation at late prophase-I.

294 We next checked the status of Smc3 acetylation at K112 and K113 during  
295 meiosis by chromatin fractionation [11]. Acetylation of Smc3 occurs during DNA  
296 replication in order to facilitate the establishment of SCC. In *cdc20mn* mutants,  
297 most of the acetylated Smc3 was found in the chromatin-bound fractions at 5 h.  
298 This further confirmed that SCC formation is mediated by Smc3 acetylation in  
299 prophase-I. At 8 h, however, 51.6% of acetylated Smc3 was recovered in the



unbound fraction (Fig 2A and 2C, and S1A Fig). This showed that not only Rec8, but also acetylated Smc3, a core component of the cohesion complex, is released from the chromatin in late meiotic prophase-I. Consistent with this, in *Xenopus* egg extracts cohesin release by the prophase pathway also decreased the level of acetylated SMC3 that was chromatin bound [15].

To see if the chromatin-bound fraction of Rec8 during late prophase-I remains sensitive to removal by separase, we artificially induced expression of the separase, Esp1, in prophase-I under conditions that deplete Cdc20 (*cdc20-mn*). Esp1 expression was driven by the *CUP1* promoter and copper was added at 3 and 5 h to induce Esp1 during prophase-I [22]. As above, Rec8 staining was reduced on chromatin at 8 h without Esp1 induction. Following Esp1 induction, a large number of Rec8 foci/lines disappeared, leaving only a few Rec8 foci per chromosome (Fig 2D). Indeed, the signal intensity of Rec8 dropped to 17.7±6.7% upon Esp1 induction, while at 5 h without Esp1 induction the Rec8 signal was reduced to 50.8±21.5% (Fig 2E). This demonstrated that most of Rec8 on chromatin during late prophase-I in *cdc20mn* cells remained sensitive to separase. Similar results were obtained when copper was added at 3 h. Finally, the sensitivity of Rec8 to Esp1 was confirmed by chromatin fractionation (Fig 2F and 2G, and S1B Fig). After 3 h of separase induction (8 h), the amount of full length Rec8 on chromatin was reduced to 19.5±5.9% (versus approximately 47.1±16.2% without Esp1 induction). The cleaved Rec8 products were too unstable to detect without a *ubr1* mutation which protects the product from degradation [37]. Separase-resistant Rec8 foci often co-localize with the centromere marker Ctf19 (Fig 2D). This confirms that kinetochores in late-prophase-I are able to protect Rec8 cohesin from cleavage by separase, while the arm-bound Rec8 seems to be more sensitive.

326

### 327 **Rec8 phosphorylation is associated with dissociation of Rec8 at late** 328 **prophase-I**

To characterize the phosphorylation status of Rec8 during late prophase-I, we used two phospho-specific antibodies; anti-Rec8-pS179 (PLK site) and anti-Rec8-pS521 (DDK site; kindly gifted by A. Amon, MIT) [24, 29]. Probing chromatin fractions revealed that Rec8-pS179-specific signals were very few at 5

h, but increased at 8 h in whole cell lysates from the *cdc20mn* mutant. The signals were nearly undetectable in *cdc5mn cdc20mn* mutants, illustrating dependence on Cdc5 (Fig 3A and 3B). Importantly, at 8 h, the Rec8-pS179 signal was recovered primarily in chromatin unbound fraction. This indicated that Cdc5-dependent S179 phosphorylation is associated with Rec8 release from meiotic chromatin. We were unable to detect the Rec8-pS179 signal on spreads. This may either indicate that the Rec8-pS179 signal was removed from spreads, or that the Rec8-pS179 antibody is too weak to detect the signal on spreads.

We stained meiotic chromosome spreads with anti-Rec8-pS521 antibody (Fig 3C) [24], and, similar to Rec8 staining result, Rec8-pS521 shows a linear signal at 5 h in the *cdc20mn*. However, unlike Rec8, some of Rec8-pS521 (a target of DDK) foci are brighter than other foci or lines, suggesting local enhancement of S521 phosphorylation. Importantly, Rec8-pS521-specific signal on spreads was reduced at 8 h, leaving several bright foci. This loss of Rec8 signal depends on Cdc5 kinase since *cdc5mn cdc20mn* maintained high levels of Rec8-pS521 on chromosomes at the late time points (Fig 3C and 3D). Quantification revealed that Rec8-pS521-specific signal was even more strongly reduced than the global Rec8 signal ( $28.9 \pm 20\%$  versus  $56.8 \pm 18.6\%$ ). This is consistent with a model whereby Rec8 phosphorylation at S521, possibly by DDK, may play a role in PLK-dependent cohesin release. We were unable to detect pS521 signals on western blots efficiently (S1D Fig) and therefore could not determine whether the released Rec8 is phosphorylated at S521.

Taken together, the above results showed that Rec8-cohesin dissociates from meiotic chromosomes during late-prophase-I independent of separase activation, consistent with a previous study [31]. This suggests the presence of a cleavage-independent pathway for cohesin release that correlates with Rec8 phosphorylation. This is similar to phosphorylation-dependent cohesin release in vertebrate pro-metaphase, the so-called mitotic “prophase pathway” [14].

361

### 362 **Rec8 phosphorylation is required for efficient dissociation of Rec8 at late** 363 **prophase-I**

364 To examine the role of Rec8 phosphorylation in cohesin release during late  
365 prophase-I, we localized phosphorylation-deficient Rec8 mutant proteins,



366 Rec8-17A and -29A on meiotic spreads [24, 38]. We introduced *rec8-17A* and  
 367 -29A mutations (S2A Fig) into the *cdc20mn* background. The Rec8-17A still can  
 368 be phosphorylated and shows a band shift, while Rec8-29A does not (S2B Fig).  
 369 We performed the same Rec8 localization studies and Rec8 staining was  
 370 characterized as linear or discontinuous as above, corresponding to the  
 371 pachytene and late (early) prophase-I stages, respectively. Both Rec8-17A and  
 372 -29A proteins showed linear staining patterns on meiotic chromosomes, like the  
 373 wild-type Rec8 protein (Fig 4A and 4B, and S2C Fig). In *rec8-17A* mutants, the  
 374 appearance of discontinuous Rec8 staining at late time points was slightly  
 375 delayed as compared with the control (S2D Fig). *rec8-29A* mutants, on the other  
 376 hand, showed a strong delay in the appearance of discontinuous dots of Rec8  
 377 staining, and of the subsequent dissociation of cohesin (Fig 4E and 4F). This was  
 378 confirmed by intensity measurements (Fig 4G and S2E Fig). The *rec8-29A*  
 379 mutant retained  $77.6 \pm 25.7\%$  of its Rec8 signal at 10 h when compared with the  
 380 level at 6 h. However, because the significant delay we observed for the release  
 381 of this Rec8 mutant in late prophase-I might be due to defects in earlier events,  
 382 such as the processing of meiotic recombination intermediates [38], we also  
 383 localized Rec8-29A mutant proteins on chromosome spreads that lacked Red1  
 384 signals, which correspond to late prophase-I. The change in Red1 staining  
 385 showed a delay in late prophase-I in the *rec8-29A* mutant (Fig 4A and 4B). A  
 386 delay in SC disassembly was also observed in the mutant (Fig 4C and 4D).  
 387 Importantly, we found that 67.4% (n=68) of Red1-negative nuclei showed linear  
 388 Rec8 staining in the *rec8-29A cdc20mn* mutant, a value that was only  
 389  $5.17 \pm 0.75\%$  (n=76) in Rec8+ *cdc20mn* cells. It is thus very likely that Rec8  
 390 phosphorylation promotes the dissociation of Rec8 cohesin from the  
 391 chromosomes in late prophase-I.

392

### 393 **Cdc5 is indispensable for cleavage-independent Rec8 dissociation from** 394 **meiotic chromosomes**

395 During the vertebrate mitotic “prophase pathway” for cohesin release is strongly  
 396 dependent on Polo-like kinase (PLK) and other kinases [14]. Therefore, we  
 397 wondered whether Cdc5, the budding yeast PLK, also regulates this release  
 398 through phosphorylation of Rec8, as previously suggested [31]. We depleted

399 Cdc5 during meiosis in the absence of Cdc20 (*cdc5mn cdc20mn*). Indeed, Cdc5  
400 depletion greatly reduced the appearance of discontinuous dots of Rec8 staining,  
401 and preserved Rec8 intensity at later time points, such as at 8 h (Fig 3E, 3F and  
402 3G). This was supported by chromatin fractionation (Fig 3A and 3B). At 8 h,  
403 approximately half of Rec8 was released from chromatin in *cdc20mn* cells, and  
404 the release was not seen at 8 h in *cdc5mn cdc20mn* mutants ( $80 \pm 16\%$  at 8 h  
405 relative to 5 h). In the absence of Cdc5, the mobility of Rec8 was rarely shifted up  
406 (Fig 3A). Therefore, we conclude that Cdc5/PLK is critical for  
407 cleavage-independent removal of Rec8 in late meiotic prophase-I, possibly  
408 through the phosphorylation of Rec8. Alternatively, in the absence of Cdc5,  
409 chromatin might be more highly compacted than in a normal meiosis [39],  
410 indirectly affecting the dissociation of the cohesin.

411 A previous study showed that ectopic expression of Cdc5 is sufficient for  
412 exit from the mid-pachytene stage in *ndt80* mutants. This is triggered by  
413 resolution of recombination intermediates into products, as well as the  
414 disassembly of SC (without entry into meiosis I) [39]. We next asked whether  
415 Cdc5 is sufficient for Rec8 chromatin dissociation by expressing Cdc5 ectopically  
416 during an *ndt80Δ* arrest. Expression of Cdc5 was induced by the addition of  
417 estradiol into the *CDC5-in ndt80* strain (Fig 5C). In concert with Zip1-disassembly,  
418 Cdc5 induction led to the formation of discontinuous Rec8 staining and thus  
419 cohesin release (Fig 5A and 5B). This process was dependent on the kinase  
420 activity of Cdc5, as kinase-dead *CDC5<sub>kd</sub>* (*CDC5-N209A*) mutants did not induce  
421 remodeling of the Rec8-containing structure during pachytene (Fig 5A and 5B).  
422 Our data argue that Cdc5 is both necessary and sufficient for cohesin release in  
423 mid/late pachytene.

424

## 425 **Rad61/Wpl1, the Wapl ortholog in yeast, regulates cohesin release during** 426 **late-prophase-I**

427 In the budding yeast, cohesin association in the mitotic G1 phase is inhibited by a  
428 Wapl ortholog, Rad61/Wpl1 [17]. The anti-cohesin activity of Rad61/Wpl1 is  
429 counteracted by Eco1-dependent acetylation of Smc3 [5, 13] and no  
430 prophase-like pathway has been reported for G2 phase in budding yeast mitosis  
431 [17]. In mammalian cells, on the other hand, a vertebrate-specific protein, sororin,

counteracts Wapl activity [8]. The fact that the budding yeast does not possess a sororin ortholog prompted us to examine the role of Rad61/Wpl1 in cohesin release during meiosis. Indeed, our previous report showed that in the *rad61/wpl1* mutant, the disassembly of Rec8 is much slower than the other axis component, Red1, whose disassembly is tightly correlated with Rec8 in wild-type [40]. This suggested an uncoupling of disassembly steps for the two axis components during late prophase-I in *rad61/wpl1* mutants. Localization of Rec8 was examined in *cdc20mn* mutants lacking *RAD61/WPL1* (Fig 6A and 6B). As compared with *cdc20-mn*, *rad61/wpl1 cdc20mn* cells showed prolonged persistence of Rec8 lines at very late time points. Even at 14 h, 32±3% *rad61/wpl1* cells retained full linear Rec8 staining (Fig 6A and 6C). Indeed, the signal intensity of Rec8 was unchanged between 5 and 8 h in the absence of Rad61/Wpl1 (Fig 6B). This suggests a key role of Rad61/Wpl1 in cohesin release in the G2 phase of yeast meiosis. Moreover, decrease of phosphorylated S521 of Rec8 signals during late prophase-I is largely dependent on *RAD61/WPL1* (S1C Fig), suggesting that Rad61/Wpl1 is critical for the release of phosphorylated Rec8 from the chromosomes.

We investigated the expression of Rad61-Flag during meiosis by western blot, and found that Rad61 exhibits multiple bands upshifted during meiosis (Fig 6D). Similar to Rec8, Rad61 expression decreases after 8 h. In addition to the two bands observed during pre-sporulation at 0 h, at least two major meiosis-specific forms of Rad61 were observed; one that started to appear at 3 h, and a second that appeared at 5 h. The slowly migrating forms of Rad61 disappeared at 8 h and were far less abundant relative to early time points. The appearance of two meiotic-specific forms of Rad61 protein, as well as its disappearance resembles Rec8, which also showed two major phosphorylated species in addition to the unmodified one [24, 25]. It seemed likely that Rad61 band shifts were due to phosphorylation, and since Rec8 phosphorylation is catalyzed by three kinases, DDK, PLK, and CK1 [24, 25], we checked the effects of these kinases on Rad61 modification. When the kinase activity of analog-sensitive Cdc7 (Cdc7-as3) was suppressed by its inhibitor, PP1, band shifts of both Rec8 and Rad61 were greatly diminished in meiosis (Fig 6E). After washing out PP1, the band shifts reappeared. This indicated that band shifts of Rad61 are dependent on Cdc7

465 (DDK) kinase activity.

466 We also checked the depletion of Cdc5 and found that the upper bands of  
467 both Rad61 and Rec8 at late time points (5 and 6 h) were nearly abolished in the  
468 *cdc5-mn* cells (Fig 6D). These results showed that, like Rec8, the Rad61-band  
469 shift requires both DDK and PLK activities. Rad61 phosphorylation is  
470 independent of meiotic recombination and DSB formation, since *spo11-Y135F*  
471 mutants displayed normal Rad61 and Rec8 band shifts (S3A Fig). On the other  
472 hand, Rec8 is essential for the PLK(Cdc5)-dependent secondary band shift of  
473 Rad61, although not the DDK-dependent one (Fig 6D). As a control, we also  
474 found band shifts of Rad61 in *rec8 cdc5-mn* cells similar to those in *rec8* cells (Fig  
475 6D). This is consistent with the fact that Rec8 directly binds to Cdc5 kinase [25].

476 Based on the sequence information of Rad61 [41], we mapped putative  
477 DDK sites in the N-terminal non-conserved region of Rad61, outside of the  
478 conserved WAPL domain (S4A Fig). These sites were as follows: T13, S25, S69,  
479 S70, T95, S96, and S97. Various substitution combinations were generated for  
480 these putative sites: *rad61-T13A*, *S25A-FLAG*, *rad61-S69A*, *S70A-FLAG*,  
481 *rad61-T95A*, *S96A*, *S97A-FLAG*, *rad61-T13A*, *S25A*, *T95A*, *S69A*, *S70A*, *S96A*,  
482 *and S97A-FLAG* (hereafter, *rad61-7A*) and we found that meiosis-specific band  
483 shifts of Rad61 were compromised in the *rad61-S69A*, *S70A-FLAG* and  
484 *rad61-7A* mutants but not in the *rad61-T13A*, *S25A-FLAG* and *rad61-T95A*,  
485 *S96A*, *S97A-FLAG* strains (Fig 6F and S4B Fig). We raised an antibody against a  
486 Rad61 peptide containing phospho-S69 and phospho-S70 sites and used it to  
487 detect phosphorylation-specific bands of Rad61. Western blotting using Rad61  
488 phospho-specific antibody clearly revealed two meiosis-specific bands, which  
489 were absent in mitosis (Fig 6F, right panels).

490 The *rad61-7A* mutant exhibited spore viability comparable to wild-type cells  
491 (S4C and S3D Fig), and entry into meiosis I was only delayed one hour (S3B Fig),  
492 suggesting that Rad61 phosphorylation plays a minor role in early prophase-I.  
493 We then investigated the effect of the *rad61-7A* mutation on Rec8 dissociation at  
494 late prophase-I in the absence of Cdc20. Compared to the *cdc20mn* mutant, the  
495 *rad61-7A cdc20mn* mutant showed a delayed disappearance of the linear  
496 staining and an appearance of discontinuous Rec8 dots at later time points (Fig  
497 6A and 6C). Again, linear Rec8 expression was frequently detected in

498 Red1-negative nuclei of *rad61-7A cdc20mn* cells (Fig 6A). The defective Rec8  
499 release in *rad61-7A* mutants was also confirmed by Rec8-intensity  
500 measurements (Fig 6B).

501 This *rad61-7A* defect resembles the *rec8-29A* mutant, although it is less  
502 pronounced than the *rad61* null mutant phenotype. The *rad61-7A rec8-29A*  
503 double mutant showed an even more delayed disappearance of Rec8 lines than  
504 the two single mutants (Fig 6A and 6C), indicating that both Rec8 and Rad61  
505 phosphorylation contribute to Rec8 release in late prophase-I. The *rad61-7A* and  
506 the *rec8-29A* single mutant show 94% and 72.7% spore viability, respectively,  
507 while spore viability in the *rad61-7A rec8-29A* double mutant was reduced to  
508 64.1% (S4C and S4D Fig). This suggests that the phosphorylation-triggered  
509 release is physiologically relevant for meiotic progression.

510 Finally, we checked a chromosome segregation defect in the mutant  
511 deficient in cohesin release by using *CENV-GFP* [42]. The *rad61-7A*, *rec8-29A*  
512 and *rad61-7A rec8-29A* mutants are proficient in sister chromatid cohesion  
513 during prophase-I (S4E left, Fig). Although the *rad61-7A* and *rec8-29A* single  
514 mutants showed little defect in disjunction of homologous chromosomes at  
515 meiosis I, the *rad61-7A rec8-29A* double mutant showed slight, but significant  
516 increase of mis-segregation of the chromosomes ( $P=0.013$ ; S4E right, Fig).  
517 These results support the notion that Rad61 and Rec8 phosphorylation play a  
518 redundant role for the segregation of homologous chromosome by regulating the  
519 phosphorylation status of cohesin components such as Rec8 and Rad61/Wpl1.

520

## 521 **PLK promotes chromosome compaction in late prophase-I**

522 To observe the consequences of Rec8-cohesin release in late prophase-I, we  
523 measured chromosome compaction using two fluorescently marked  
524 chromosome loci on chromosome IV in three strains, *ndt80*, *cdc20mn*, and  
525 *cdc5mn cdc20mn* (Fig 5D). At 0 h, the distance between the two loci was  
526  $1.55 \pm 0.42 \mu\text{m}$  in the *cdc20mn* mutant, and this was reduced to  $1.3 \pm 0.4 \mu\text{m}$  at 5 h  
527 (Fig 5E) with no further decrease at 8 h in the *ndt80* mutant ( $1.3 \pm 0.5$  [5 h] and  
528  $1.2 \pm 0.4 \mu\text{m}$  [8 h]). This is consistent with a compaction that occurs in pachytene  
529 chromosomes [40]. The *cdc20mn* mutant showed an additional decrease of the  
530 distance to  $0.6 \pm 0.3 \mu\text{m}$  at 8 h, or compaction to 37% of initial length. This argues

for a specific chromosome compaction event of ~3-fold in prophase-I after pachytene stage. Importantly, this drastic chromosome compaction completely depends on Cdc5 PLK. The *cdc5mn cdc20mn* cells showed only mild compaction of chromosomes both at 5 and 8 h (Fig 5D and 5E).

## Discussion

Together with a previous study [31], our results suggest the existence of a phosphorylation-controlled step during late prophase-I/pro metaphase-I that leads to the partial release of cohesin in meiotic yeast cells. This occurs in addition to the previously identified two steps of cohesin release at metaphase/anaphase-I and -II (Fig. 7, top) [19, 37]. Prior to the final cleavage-dependent removal of cohesin, we show a cleavage-independent removal, which releases the meiotic kleisin subunit, Rec8, intact, at late prophase-I. This is a meiotic “prophase-like pathway” as it is analogous to the “prophase” pathway in mitotic G2-phase and pro-metaphase of vertebrate cells [14]. Interestingly, mitotic cells in budding yeast seem to lack the prophase pathway [17]. This is consistent with the fact that budding yeast does not possess a sororin ortholog, the key regulator of cleavage-independent removal of cohesin during the late G2 phase in vertebrates [8]. Whereas vertebrate cells inactivate the Wapl inhibitor, sororin, in mitotic prophase, meiotic yeast cells appear to regulate the activity of Wapl, Rad61/Wpl1, positively by meiosis-specific phosphorylation, and also to control Rec8’s affinity to Smc3 negatively by meiosis-specific phosphorylation of Rec8.

## Meiotic prophase-like pathway shares similar mechanism with the vertebrate prophase pathway for cohesin release

Similar to the vertebrate prophase pathway [14], the meiotic prophase pathway for cohesin release in budding yeast is independent of cohesin cleavage. Rec8 was released from meiotic chromosomes in the absence of separase activity in Cdc20-depleted cells, as well as in cleavage-resistant *Rec8-N* cells. Moreover, we were able to recover the full-length Rec8 protein, which was stably bound to the chromatin during mid-pachytene, in chromatin-soluble fractions during late prophase-I (Fig 2A). These results show that a mechanism that releases



564 Rec8-cohesin independent of kleisin cleavage exists.

565       Like the mammalian prophase pathway, the meiotic prophase pathway in  
566 yeast requires WAPL (Rad61/Wpl1) and PLK (Cdc5). During the mitotic G1  
567 phase in yeast, Rad61/Wpl1 is known to promote the dissociation of mitotic  
568 cohesin [17]. During the mammalian mitotic prophase and the yeast G1 phase,  
569 the Wapl works together with Pds5 to mediate the opening of the exit gate  
570 between Scc1-Smc3 [11]. Judged by the role of Rad61/Wpl1, we propose that the  
571 meiotic prophase pathway is mechanistically similar to the mammalian prophase  
572 pathway and the G1 pathway in yeast. The release of meiotic cohesin in late  
573 prophase-I may occur through the opening at the interface between Rec8 and  
574 Smc3 (Fig. 7, bottom). It might be possible to confirm this by expressing a  
575 Smc3-Rec8 fusion protein that locks the interface between the meiotic kleisin,  
576 Rec8, and Smc3.

577

578 **Yeast meiotic prophase-like pathway is regulated in a different manner**  
579 **from the vertebrate prophase pathway**

580 In vertebrate cells, sororin inactivation is essential for the cleavage-independent  
581 release of cohesin. Sororin is likely bound to the PDS5A/B, to which Wapl also  
582 binds. Sororin binding sterically hinders the binding of PDS5A/B to Wapl, and as  
583 a result, Wapl is unable to open the exit gate [1]. Phosphorylated sororin  
584 dissociates from PDS5A/B, allowing for binding between Wapl and PDS5A/B,  
585 which leads to opening of the gate. Given that budding yeast lacks sororin, the  
586 anti-cohesin activity of Rad61/Wpl1 in yeast is counteracted by Eco1-mediated  
587 acetylation of Smc3, which is sufficient to antagonize Rad61 activity in G2 phase  
588 [5, 13]. We found that Smc3 acetylation is maintained during prophase-I (G2  
589 phase) of meiosis (Fig 2A). Thus, rather than inactivating a negative regulator for  
590 Wapl, yeast meiotic cells seem to display a novel mechanism for cohesin release  
591 through enhancement of Rad61/Wpl1 activity. This enhancement correlates with  
592 the phosphorylation of the Rad61, which may either enhance Wapl activity  
593 directly and/or increase the interaction between Rec8 and Rad61.

594       In addition to previously identified Cdc5/PLK [31], we identified two critical  
595 regulators of the meiosis prophase pathway, Rad61 and DDK. All three  
596 regulators are expressed during mitosis and meiosis. Nevertheless, our results

597 show a meiosis-specific regulation of cohesin removal. Since, during meiosis,  
598 Scc1 is replaced by the meiosis-specific kleisin Rec8, we propose that Rec8 is an  
599 essential component for the meiosis-specific prophase pathway. In mitotic cells,  
600 PLK-dependent phosphorylation of Scc1 promotes its cleavage, rather than the  
601 release. Thus, the meiotic specificity of the prophase pathway is conferred by  
602 replacing Scc1 by Rec8.

603 In addition, Rad61 is phosphorylated only in meiotic prophase-I by the two  
604 mitotic kinases, DDK and PLK. Rec8 is known to interact directly with Cdc5/PLK  
605 [25]. We also show that the meiosis-specific Cdc5-dependent phosphorylation of  
606 Rad61 requires Rec8. Therefore, Rec8 has dual functions in cohesin release  
607 during meiosis. Rec8 exhibits an intrinsic property that allows it to respond to the  
608 anti-cohesin activity of Wapl, as well as the ability to enhance Wapl activity by  
609 promoting its phosphorylation. The exact mechanism that induces the  
610 meiosis-specific, DDK-dependent phosphorylation of Rad61 in early prophase-I  
611 is unknown. We know that Rec8 at least does not play an essential role in this  
612 phosphorylation, as *rec8* mutants were able to initiate meiosis-specific  
613 DDK-dependent phosphorylation of Rad61. We propose that phosphorylation of  
614 Rad61 may augment anti-cohesin activities, and consequently, the gate-opening  
615 activity of the protein (Fig. 7). In addition, we also propose that Rec8  
616 phosphorylation may loosen the binding of Rec8 to Smc3 and Rad61 to unlock  
617 the Rec8-Smc3 gate.

618

### 619 **The meiotic prophase pathway is conserved in higher eukaryotes**

620 The cleavage-independent pathway of cohesin release during meiosis is  
621 conserved in higher eukaryotes such as nematodes, plants, and mammals. In  
622 these organisms, differential distributions and/or reduced signals of cohesin on  
623 chromosomes or chromosome arms were observed in late prophase-I, as in  
624 diakinesis. In nematodes, cohesin on short arms, but not on long arms, is likely to  
625 be removed, in a manner dependent on aurora kinase, *air-2* [43]. Interestingly, in  
626 nematodes, Wapl (*wapl-1*), controls the dynamics of kleisin COH3/4-containing  
627 cohesin, but not of cohesin associated with Rec8 [44]. Immuno-staining showed  
628 that in *Arabidopsis thaliana*, most Rec8 molecules are released from meiotic  
629 chromosomes during the diplotene stage, and this is mediated by Wapl [45]. Like



630 yeast, *C. elegans* and *A. thaliana* lack a clear sororin ortholog, indicating that the  
631 removal of cohesin during meiosis is sororin-independent.

632 Rec8 is conserved from yeasts to mammals. Thus, the meiotic prophase  
633 pathway might be also conserved in mammals. On the other hand, in mammals,  
634 in addition to REC8, the other meiosis-specific kleisin, RAD21L, and also  
635 meiosis-specific SMC1 $\beta$  and STAG3 are expressed [46]. Therefore, the control of  
636 cohesin release during mammalian meiosis may be more complicated. In mouse  
637 spermatocytes, the RAD21L kleisin, but not REC8, is predominantly removed  
638 during the diplotene stage, in a manner partially dependent on PLK [18]. Recently,  
639 a novel regulatory circuit for cohesin removal was described during  
640 spermatogenesis, where NEK1 kinase-dependent “de”phosphorylation of WAPL  
641 promotes its retention on chromosomes and consequently the release of cohesin  
642 [47]. It was observed that during meiosis in mouse spermatocytes,  
643 phosphorylation of Wapl inhibits its activity. This is in sharp contrast to the role of  
644 Rad61 phosphorylation in the budding yeast, but may again reflect the absence  
645 of sororin in yeast.

646

#### 647 **Local regulation of protection and promotion of cohesin removal along the** 648 **chromosomes**

649 Results presented in this work showed that approximately 50-60% of  
650 chromosome-bound Rec8 at the pachytene stage can be dissociated from  
651 chromosomes during late prophase-I. On the other hand, 40-50% of Rec8  
652 remains stably bound to chromosomes during late prophase-I, suggesting that  
653 these Rec8 molecules are either protected against or are not activated for the  
654 meiotic prophase-like pathway. Most of the chromatin-bound Rec8 at late  
655 prophase-I is still sensitive to artificially expressed separase while, as expected,  
656 Rec8 at kinetochores is resistant to it. At the onset of anaphase-I,  
657 kinetochore-bound Rec8 is protected by a molecule called Shugoshin (Sgo1) [25,  
658 27], which is bound to kinetochores during late prophase-I. Indeed, artificial  
659 expression of separase in pachytene-arrested cells; e.g. *ndt80* mutant,  
660 completely removes Rec8 even at kinetochores [22]. Thus, the full protection of  
661 kinetochore-bound Rec8 is established only after the exit from mid-pachytene. In  
662 the mammalian prophase pathway, kinetochore-bound cohesin is protected by

663 Shugoshin/PP2A which dephosphorylates subunits like sororin. A similar  
664 protection mechanism seen in the mammalian mitotic prophase pathway may  
665 also operate on cohesins that are bound to meiotic chromosome arms and to the  
666 kinetochores. However, protection of arm cohesin, which is sensitive to separase,  
667 must be functionally distinct from kinetochore-cohesin, which is not.

668 The meiotic prophase pathway requires DDK- and PLK-dependent  
669 meiosis-specific phosphorylation of Rec8 and Rad61. Indeed, we showed that  
670 the Rec8 released from chromosomes is more phosphorylated than the  
671 complement that remains tightly bound to chromosomes. One plausible  
672 mechanism for the observed protection against the prophase pathway is local  
673 activation of dephosphorylation of cohesin, as seen at kinetochores, where  
674 Shugoshin recruits the phosphatase PP2A. This is similar to the role that Sgo1  
675 plays in protection of centromeric cohesin at the onset of anaphase-I in  
676 vertebrate meiosis.

677 Alternatively, local activation by phosphorylation of Rec8 and Rad61 may  
678 be a mechanism that promotes cohesin release in distinct chromosomal regions.  
679 For instance, local removal of cohesion at the site of chiasmata [48] may be a  
680 necessary step in the formation of normal diplotene bivalents.

681

## 682 **Is Rec8 phosphorylation indeed required for the cleavage by separase?**

683 Previous reports strongly suggested that phosphorylation of Rec8 by DDK, PLK,  
684 and CK1 is essential for cleavage by separase [24, 25]. However, this was not  
685 directly tested by an *in vitro* cleavage assay. Our results presented here suggest  
686 an additional role for Rec8 phosphorylation by DDK and PLK: the dissociation of  
687 Rec8-cohesin at late prophase-I. However, we and others [22] also showed that  
688 chromosome-bound Rec8 with reduced phosphorylation can be a substrate for  
689 separase-mediated cleavage *in vivo*, since ectopic expression of separase in  
690 late prophase-I was sufficient for the removal of Rec8-cohesin from  
691 chromosome arms, but not from centromeres (Fig 2D). Thus, it is possible that  
692 phosphorylation of Rec8 plays a major role in cleavage-independent dissociation  
693 of cohesin, in addition to triggering it for cleavage by separase.

694

## 695 **Functions of the meiotic prophase pathway**

696 Given that cohesin at the chromosome arms is important for chromosome  
697 segregation in MI, one may suggest that the meiotic-prophase pathway is  
698 dangerous in meiotic cells, and thus, it is important to ask why meiosis has  
699 retained this dangerous pathway. It is known that during late prophase-I, which  
700 corresponds to diplotene and diakinesis in other organisms, drastic changes in  
701 chromosome morphology occur [49]. This includes strong compaction while  
702 chiasmata emerge, to prepare for chromosome segregation. In meiosis I, the  
703 chiasmata are essential for chromosome segregation. Indeed, loss of cohesion  
704 around chiasmata sites has been observed in various organisms [48]. Similarly,  
705 in worms, Wapl-dependent cohesin removal promotes recombination-mediated  
706 change of meiotic chromosome structure [44].

707 We propose that one function of cohesin release in late prophase-I is to  
708 promote chiasma formation. Since the individualization of chromosomes may be  
709 important for development of chiasmata. In addition, in late prophase-I,  
710 chromosomes show drastic compaction. Even in the budding yeast, late meiotic  
711 chromosomes are compacted by approximately 3 fold as compared with their  
712 sizes in meiotic G1 (this study) [31]. Concomitant with this drastic compaction,  
713 condensin has been shown to bind to meiotic chromosomes following the  
714 pachytene stage [31, 50]. The binding of condensin not only promotes  
715 condensation, but also facilitates the release of cohesin [31], and may promote  
716 individualization of chromatids. In this work we show that Cdc5 depletion causes  
717 both a failure in the meiotic prophase pathway and a defect in chromosome  
718 compaction. This is consistent with a role of cohesin removal in compaction,  
719 although other interpretations are possible. What the basic purpose of cohesin  
720 removal in prophase is either to make space for condensin, to allow chiasma  
721 morphogenesis, or to allow compaction. Which of these, or yet another function,  
722 remains to be answered in future studies.

723

## 724 **Materials and Methods**

725

## 726 **Strains and strain construction**

727 All strains described here are derivatives of SK1 diploid strains, MSY832/833  
728 (*MAT $\alpha$ /MAT $\alpha$* , *ho::LYS2*<sup>+</sup>, *lys2*<sup>+</sup>, *ura3*<sup>+</sup>, *leu2::hisG*<sup>+</sup>, *trp1::hisG*<sup>+</sup>). Strain  
729 genotypes are given in S1 Table. *CEN4-GFP/TEL4-GFP* and  
730 Esp1-overexpression strains were provided by Dr. Doug Koshland and Dr. Keun  
731 P. Kim, respectively.

732

## 733 **Antisera and antibodies**

734 Anti-Zip1, anti-Red1, and anti-Rec8 antisera for cytology and western blotting  
735 have been described previously [51, 52]. Secondary antibodies conjugated with  
736 Alexa488 and Alexa594 dyes (Molecular Probes, Life Technologies, UK) were  
737 used for the detection of the primary antibodies. Anti-Rec8-pS179 (PLK site) and  
738 anti-Rec8-pS521 (DDK site) were generous gifts from Dr. Angelika Amon (MIT).  
739 Anti-acetyl-Smc3 was a gift by Dr. Katsu Shirahige (U. of Tokyo).  
740 Anti-Rad61-PS69-pS70 antibody was raised in rabbit using a Rad61 peptide  
741 containing pS69 and pS70 by a company (MBL Co. Ltd).

742

## 743 **Cytology**

744 Immunostaining of chromosome spreads was performed as described  
745 previously[53, 54]. Stained samples were observed using an epi-fluorescence  
746 microscope (BX51; Olympus, Japan) with a 100X objective (NA1.3). Images  
747 were captured by CCD camera (CoolSNAP; Roper, USA), and afterwards  
748 processed using IP lab and/or iVision (Sillicon, USA), and Photoshop (Adobe,  
749 USA) software tools.

750

## 751 **SIM imaging**

752 The structured illumination microscopy was carried out using super  
753 resolution-structured illumination (SR-SIM) microscope (Elyra S.1 [Zeiss],  
754 Plan-Apochromat 63x/1.4 NA objective lens, EM-CCD camera [iXon 885; Andor  
755 Technology], and ZEN Blue 2010D software [Zeiss]) at Friedrich Miescher  
756 Institute for Biomedical Research, Switzerland. Image processing was performed

757 with Zen software (Zeiss, Germany), NIH image J and Photoshop.

758

## 759 **Fluorescence intensity measurement**

760 Mean fluorescence of the whole nucleus was quantified with Image J.  
761 Quantification was performed using unprocessed raw images and identical  
762 exposure time setting in DeltaVision system (Applied Precision, USA). The area  
763 of a nuclear spread was defined as an oval, and the mean fluorescence intensity  
764 was measured within this area.

765

## 766 **Chromatin fractionation**

767 Chromatin fractionation was performed as described previously[55]. The cells  
768 were digested with Zymolyase 100T (Nakarai Co. Ltd) and the spheroplasts  
769 were pelleted. The pellets were resuspended in five volumes of hypotonic buffer  
770 (HB; 100 mM MES-NaOH, pH 6.4, 1 mM EDTA, 0.5 mM MgCl<sub>2</sub>) supplemented  
771 with a protease inhibitor cocktail (Sigma, USA). After 5 min, 120 µl of whole cell  
772 extract (WCE) were layered onto 120 µl of 20% (W/V) sucrose in HB and  
773 centrifuged for 10 min at 16,000 g. The supernatants were saved and the pellets  
774 were resuspended in 120 µl EBX buffer (50 mM HEPS-NaOH, pH 7.4, 100 mM  
775 KCl, 1 mM EDTA, 2.5 mM MgCl<sub>2</sub>, 0.05% Triton X100) and centrifuged for 10 min  
776 at 16,000 g. The pellets were again collected and resuspended in EBX buffer  
777 with 5 units/ml DNase I and 1 mM MgCl<sub>2</sub> for 5 min. The supernatants were  
778 saved for further analysis.

779

## 780 **Cohesion and pairing assays**

781 Sister chromatid cohesion and chromosome segregation during meiosis I was  
782 analysed using yeast cells heterozygous for LacI-GFP spots at *CEN5* locus [42].  
783 Following fluorescence microscope imaging, the number of chromosomal  
784 locus-marked GFP foci in a single cell was counted manually. For sister  
785 chromatid cohesion, cells with single DAPI body at 5 h were examined. For the  
786 observations of chromosome segregation in meiosis I, cells with two DAPI  
787 bodies were selected at 6, 7 and 8 h, and the number of GFP focus in each DAPI  
788 body was counted.

789

## 790 **Compaction assay**

791 For distance measurements on probed SCs at 0, 5 and 8 h, chromosome  
792 spreads were prepared as described above and stained with both anti-Rec8 and  
793 anti-GFP antibodies. The distance between two GFP foci on chromosome IV  
794 was measured by Velocity<sup>TM</sup> program (Applied Precision, USA) or IPLab (Silicon,  
795 USA).

## 797 **Yeast culture**

798 Yeast cell culture and time-course analyses of the events during meiosis and the  
799 cell cycle progression were performed as described previously[54].

## 801 **Statistics**

802 Means  $\pm$  S.D values are shown. Datasets were compared using the  
803 Mann-Whitney U-test.  $\chi^2$ -test was used for proportion. Multiple test correction  
804 was done with Bonferroni's correction. \*, \*\*, and \*\*\* show P-values of <0.05,  
805 <0.01 and <0.001, respectively. The results of all statistical tests are shown in  
806 Supplemental Table 2.

## 808 **Supplemental Information**

### 809 **S1 Fig. Rec8 dissociates from meiotic chromosomes at late prophase-I. A:**

810 Chromatin fractionation assay was carried out using *CDC20-mn* (KSY642/643)  
811 and *ndt80* (KSY467/468) mutant cells. Western blotting was performed for whole  
812 cell extracts (W), soluble fractions (S) and chromatin-bound fraction (P). Rec8  
813 (top) and acetyl-Smc3 (second) were probed together with tubulin (third) and  
814 Histone 2B (H2B; bottom) as controls for soluble and chromatin-bound proteins,  
815 respectively. **B:** Chromatin fractionation assay of *CDC20-mn pCUP-Esp1-9myc*  
816 (KSY1009/1010) cells without and with overexpression of Esp1 was carried out  
817 as shown in (A). **C:** Localization of Rec8 (red) and Rec8-pS521 (phospho-S521;  
818 green) was analyzed in *cdc20-mn rad61* (KSY637/638) cells at 5 and 8 h. Total  
819 Rec8, Rec8-pS521, and DAPI signal intensity was studied as in Fig. 1C and  
820 shown in bottom. Error bars show the S.D. (n=3). **D:** Western blotting of Rec8  
821 pS521 in *CDC20-mn* (KSY642/643) was done with tubulin as a control.

822

**823 S2 Fig. Rec8 phosphorylation and phosphorylation-defective mutants. A: A.**

824 Schematic drawing of Rec8-17A and Rec8-29A mutant proteins. Mutated amino  
825 acid residues are shown in red. **B:** Western blotting analysis of Rec8 and tubulin  
826 was carried out using *CDC20-mn* (KSY642/643), *CDC20-mn rec8-29A*  
827 (KSY866/867) and *CDC20-mn rec8-17A* (KSY812/813) cells strain as described  
828 (A). Phosphorylated species of Rec8 and tubulin. Representative images are  
829 shown. **C:** Localization of Rec8 (red) on chromosome spreads was analyzed for  
830 *CDC20-mn* (KSY642/643) and *CDC20-mn rec8-17A* (KSY812/813) cells.  
831 Representative image with or without DAPI (blue) dye is shown. The bar  
832 indicates 2µm. **D:** Kinetics of Rec8 staining classes in (C) was analyzed as in Fig  
833 1B. A minimum 100 cells were analyzed at each time point. **E:** Quantified total  
834 Rec8 and DAPI signal intensity was measured. A minimum 30 nuclei were  
835 quantified in each representative time points. Error bars show the S.D. (n=3).

836

**837 S3 Fig. Meiosis-specific Rad61 phosphorylation in**  
**838 phosphorylation-defective *rad61* mutants. A:** The western blotting analysis

839 was carried out for Rad61-Flag in *RAD61-FLAG* (KSY440/441),  
840 *rad61-S69AS70A-FLAG* (KSY754/757) and *rad61-7A-FLAG* (KSY753/755)  
841 strains. **B:** Bands shifts of Rad61 in *ndt80 RAD61-FLAG* (KSY467/468) and  
842 *spo11-Y135F RAD61-FLAG* (KSY474/475) cells were analyzed as shown in (A).

843

**844 S4 Fig. Meiotic phenotypes of phosphorylation-defective *rad61* and *rec8***

845 **mutants. A:** Schematic drawing of Rad61 with putative DDK-dependent (red)  
846 and PLK-dependent phosphorylation sites (green). Conserved “WAPL” domain  
847 is shown in a box. **B:** Kinetics of the entry into meiosis I in wild-type  
848 (MSY832/833) and *rad61-7A* (KSY753/755) cells was analyzed by DAPI  
849 counting. A cell with 2, 3, and 4 DAPI bodies was counted. At each time point,  
850 more than 100 cells were examined. **C:** Distribution of viable spores per tetrad in  
851 various strains was measured and shown. Spores were incubated after  
852 dissection at 30°C for 3 days. Each bar indicates the percentage of classes with  
853 4, 3, 2, 1 and 0 viable spores per tetrad. Spore viability and the total number of  
854 dissected tetrads (parentheses) are also shown. Wild type (MSY832/833),  
855 *rad61-7A* (KSY753/755), *rec8-29A* (KSY814/815), *rec8-29A rad61-7A*



(KSY982/983) cells. **D:** Percentage of viable spores in various strains was shown in graph. Wild type (MSY832/833), *rad61-7A* (KSY753/755), *rec8-29A* (KSY814/815), *rec8-29A rad61-7A* (KSY982/983) cells. **E:** Sister chromatid cohesion and segregation of homologous chromosome were analyzed. A cell heterozygous for *CEN4-GFP* locus was used. At least more than 50 cells with single and two DAPI bodies in a cell were examined for the number of *CEN4-GFP* spot at 4, 5, and 6 h. For sister chromatid cohesion assay (left graph), the number of a cell containing single DAPI body with either 1 or 2 GFP spots was counted. For segregation assay of homologous chromosomes at meiosis I (right graph), a cell containing two DAPI bodies was examined for either both two DAPI bodies contained 1 GFP spot or one of two DAPI bodies contained 1 or 2 spots. Wild type (MSY833/KSY216), *rad61-7A* (KSY653/1089), *rec8-29A* (KSY814/1086), *rec8-29A rad61-7A* (KSY982/1091) cells.

869

870 **S1 Table. Strain list.** The strain used in this study and its genotype.

871

872 **S2 Table. Numerical and statistical data.** Numerical data underlying graphs  
873 and summary statistics.

874



## 875 **Acknowledgements**

876 We are grateful to Drs. A. Marston, K. Matsuzaki, and H. B. D. P. Rao as well as  
877 the members of the Shinohara lab for helpful discussions. We thank Drs. A.  
878 Seeber and L. Gelman for help with SIM and Ms. A. Murakami and H.  
879 Wakabayashi for excellent technical assistance. We are grateful to Drs. A. Amon,  
880 K. Kim, D. Koshland, K. Shirahige, K. Nasmyth, and W. Zachariae for materials  
881 used in this study.

882

## 883 **Author contributions**

884 **Conceptualization:** Kiran Challa, Franz Klein, Akira Shinohara

885 **Formal analysis:** Kiran Challa, Ghanim Fajish V

886 **Funding acquisitions:** Akira Shinohara

887 **Investigation:** Kiran Challa, Ghanim Fajish V, Miki Shinohara, Franz Klein,  
888 Susan M. Gasser, Akira Shinohara

889 **Methodology:** Kiran Challa, Miki Shinohara, Susan M. Gasser

890 **Project administrations:** Akira Shinohara

891 **Resources:** Kiran Challa, Miki Shinohara

892 **Supervision:** Akira Shinohara

893 **Validation:** Kiran Challa

894 **Visualization:** Kiran Challa, Ghanim Fajish V, Akira Shinohara

895 **Writing - original draft:** Akira Shinohara

896 **Writing – review & editing:** Kiran Challa, Miki Shinohara, Franz Klein, Susan M.  
897 Gasser, Akira Shinohara

898

# References

1. Marston AL. Chromosome segregation in budding yeast: sister chromatid cohesion and related mechanisms. *Genetics*. 2014;196(1):31-63. Epub 2014/01/08. doi: 10.1534/genetics.112.145144. PubMed PMID: 24395824; PubMed Central PMCID: PMCPMC3872193.
2. Gruber S, Haering CH, Nasmyth K. Chromosomal cohesin forms a ring. *Cell*. 2003;112(6):765-77. Epub 2003/03/26. PubMed PMID: 12654244.
3. Ciosk R, Shirayama M, Shevchenko A, Tanaka T, Toth A, Shevchenko A, et al. Cohesin's binding to chromosomes depends on a separate complex consisting of Scc2 and Scc4 proteins. *Molecular Cell*. 2000;5(2):243-54. Epub 2000/07/06. PubMed PMID: 10882066.
4. Rolef Ben-Shahar T, Heeger S, Lehane C, East P, Flynn H, Skehel M, et al. Eco1-dependent cohesin acetylation during establishment of sister chromatid cohesion. *Science*. 2008;321(5888):563-6. Epub 2008/07/26. doi: 10.1126/science.1157774. PubMed PMID: 18653893.
5. Rowland BD, Roig MB, Nishino T, Kurze A, Uluocak P, Mishra A, et al. Building sister chromatid cohesion: Smc3 acetylation counteracts an antiestablishment activity. *Molecular Cell*. 2009;33(6):763-74. Epub 2009/03/31. doi: 10.1016/j.molcel.2009.02.028. PubMed PMID: 19328069.
6. Unal E, Heidinger-Pauli JM, Kim W, Guacci V, Onn I, Gygi SP, et al. A molecular determinant for the establishment of sister chromatid cohesion. *Science*. 2008;321(5888):566-9. Epub 2008/07/26. doi: 10.1126/science.1157880. PubMed PMID: 18653894.
7. Uhlmann F, Lottspeich F, Nasmyth K. Sister-chromatid separation at anaphase onset is promoted by cleavage of the cohesin subunit Scc1. *Nature*. 1999;400(6739):37-42. Epub 1999/07/14. doi: 10.1038/21831. PubMed PMID: 10403247.
8. Nishiyama T, Ladurner R, Schmitz J, Kreidl E, Schleiffer A, Bhaskara V, et al. Sororin mediates sister chromatid cohesion by antagonizing Wapl. *Cell*. 2010;143(5):737-49. Epub 2010/11/30. doi: 10.1016/j.cell.2010.10.031. PubMed PMID: 21111234.
9. Kueng S, Hegemann B, Peters BH, Lipp JJ, Schleiffer A, Mechtler K, et al.

- 932        Wapl controls the dynamic association of cohesin with chromatin. *Cell*.  
933        2006;127(5):955-67. Epub 2006/11/23. doi: 10.1016/j.cell.2006.09.040.  
934        PubMed PMID: 17113138.
- 935    10. Gandhi R, Gillespie PJ, Hirano T. Human Wapl is a cohesin-binding protein  
936        that promotes sister-chromatid resolution in mitotic prophase. *Curr Biol*.  
937        2006;16(24):2406-17. Epub 2006/11/23. doi: 10.1016/j.cub.2006.10.061.  
938        PubMed PMID: 17112726; PubMed Central PMCID: PMC1850625.
- 939    11. Chan KL, Roig MB, Hu B, Beckouet F, Metson J, Nasmyth K. Cohesin's DNA  
940        exit gate is distinct from its entrance gate and is regulated by acetylation.  
941        *Cell*. 2012;150(5):961-74. Epub 2012/08/21. doi: 10.1016/j.cell.2012.07.028.  
942        PubMed PMID: 22901742; PubMed Central PMCID: PMC3485559.
- 943    12. Gruber S, Arumugam P, Katou Y, Kuglitsch D, Helmhart W, Shirahige K, et al.  
944        Evidence that loading of cohesin onto chromosomes involves opening of its  
945        SMC hinge. *Cell*. 2006;127(3):523-37. Epub 2006/11/04. doi:  
946        10.1016/j.cell.2006.08.048. PubMed PMID: 17081975.
- 947    13. Sutani T, Kawaguchi T, Kanno R, Itoh T, Shirahige K. Budding yeast  
948        Wpl1(Rad61)-Pds5 complex counteracts sister chromatid  
949        cohesion-establishing reaction. *Curr Biol*. 2009;19(6):492-7. Epub  
950        2009/03/10. doi: 10.1016/j.cub.2009.01.062. PubMed PMID: 19268589.
- 951    14. Haarhuis JH, Elbatsh AM, Rowland BD. Cohesin and its regulation: on the  
952        logic of X-shaped chromosomes. *Dev Cell*. 2014;31(1):7-18. Epub  
953        2014/10/15. doi: 10.1016/j.devcel.2014.09.010. PubMed PMID: 25313959.
- 954    15. Nishiyama T, Sykora MM, Huis in 't Veld PJ, Mechtler K, Peters JM. Aurora B  
955        and Cdk1 mediate Wapl activation and release of acetylated cohesin from  
956        chromosomes by phosphorylating Sororin. *Proc Natl Acad Sci U S A*.  
957        2013;110(33):13404-9. Epub 2013/08/01. doi: 10.1073/pnas.1305020110.  
958        PubMed PMID: 23901111; PubMed Central PMCID: PMC3746921.
- 959    16. Marston AL. Shugoshins: tension-sensitive pericentromeric adaptors  
960        safeguarding chromosome segregation. *Mol Cell Biol*. 2015;35(4):634-48.  
961        Epub 2014/12/03. doi: 10.1128/MCB.01176-14. PubMed PMID: 25452306;  
962        PubMed Central PMCID: PMC4301718.
- 963    17. Lopez-Serra L, Lengronne A, Borges V, Kelly G, Uhlmann F. Budding yeast  
964        Wapl controls sister chromatid cohesion maintenance and chromosome

- condensation. *Curr Biol.* 2013;23(1):64-9. Epub 2012/12/12. doi: 10.1016/j.cub.2012.11.030. PubMed PMID: 23219725.
18. Ishiguro K, Kim J, Fujiyama-Nakamura S, Kato S, Watanabe Y. A new meiosis-specific cohesin complex implicated in the cohesin code for homologous pairing. *EMBO Rep.* 2011;12(3):267-75. Epub 2011/01/29. doi: 10.1038/embor.2011.2. PubMed PMID: 21274006; PubMed Central PMCID: PMC3059921.
19. Klein F, Mahr P, Galova M, Buonomo SB, Michaelis C, Nairz K, et al. A central role for cohesins in sister chromatid cohesion, formation of axial elements, and recombination during yeast meiosis. *Cell.* 1999;98(1):91-103. Epub 1999/07/21. doi: 10.1016/S0092-8674(00)80609-1. PubMed PMID: 10412984.
20. Lee J, Hirano T. RAD21L, a novel cohesin subunit implicated in linking homologous chromosomes in mammalian meiosis. *J Cell Biol.* 2011;192(2):263-76. Epub 2011/01/19. doi: 10.1083/jcb.201008005. PubMed PMID: 21242291; PubMed Central PMCID: PMC3172173.
21. Trelles-Sticken E, Adelfalk C, Loidl J, Scherthan H. Meiotic telomere clustering requires actin for its formation and cohesin for its resolution. *J Cell Biol.* 2005;170(2):213-23. PubMed PMID: 16027219.
22. Yoon SW, Lee MS, Xaver M, Zhang L, Hong SG, Kong YJ, et al. Meiotic prophase roles of Rec8 in crossover recombination and chromosome structure. *Nucleic Acids Res.* 2016;44(19):9296-314. Epub 2016/11/02. doi: 10.1093/nar/gkw682. PubMed PMID: 27484478; PubMed Central PMCID: PMCPMC5100558.
23. Loidl J. Conservation and Variability of Meiosis Across the Eukaryotes. *Annu Rev Genet.* 2016;50:293-316. Epub 2016/10/01. doi: 10.1146/annurev-genet-120215-035100. PubMed PMID: 27686280.
24. Brar GA, Kiburz BM, Zhang Y, Kim JE, White F, Amon A. Rec8 phosphorylation and recombination promote the step-wise loss of cohesins in meiosis. *Nature.* 2006;441(7092):532-6. Epub 2006/05/05. doi: 10.1038/nature04794. PubMed PMID: 16672979.
25. Katis VL, Lipp JJ, Imre R, Bogdanova A, Okaz E, Habermann B, et al. Rec8 phosphorylation by casein kinase 1 and Cdc7-Dbf4 kinase regulates cohesin

998 cleavage by separase during meiosis. *Dev Cell*. 2010;18(3):397-409.  
999 PubMed PMID: 20230747.

1000 26. Kitajima TS, Kawashima SA, Watanabe Y. The conserved kinetochore  
1001 protein shugoshin protects centromeric cohesion during meiosis. *Nature*.  
1002 2004;427(6974):510-7. Epub 2004/01/20. doi: 10.1038/nature02312.  
1003 PubMed PMID: 14730319.

1004 27. Kitajima TS, Sakuno T, Ishiguro K, Iemura S, Natsume T, Kawashima SA, et  
1005 al. Shugoshin collaborates with protein phosphatase 2A to protect cohesin.  
1006 *Nature*. 2006;441(7089):46-52. Epub 2006/03/17. doi: 10.1038/nature04663.  
1007 PubMed PMID: 16541025.

1008 28. Riedel CG, Katis VL, Katou Y, Mori S, Itoh T, Helmhart W, et al. Protein  
1009 phosphatase 2A protects centromeric sister chromatid cohesion during  
1010 meiosis I. *Nature*. 2006;441(7089):53-61. Epub 2006/03/17. doi:  
1011 10.1038/nature04664. PubMed PMID: 16541024.

1012 29. Attner MA, Miller MP, Ee LS, Elkin SK, Amon A. Polo kinase Cdc5 is a  
1013 central regulator of meiosis I. *Proc Natl Acad Sci U S A*.  
1014 2013;110(35):14278-83. Epub 2013/08/07. doi: 10.1073/pnas.1311845110.  
1015 PubMed PMID: 23918381; PubMed Central PMCID: PMC3761645.

1016 30. Hernandez MR, Davis MB, Jiang J, Brouhard EA, Severson AF,  
1017 Csankovszki G. Condensin I protects meiotic cohesin from WAPL-1  
1018 mediated removal. *PLoS Genetics*. 2018;14(5):e1007382. Epub 2018/05/17.  
1019 doi: 10.1371/journal.pgen.1007382. PubMed PMID: 29768402; PubMed  
1020 Central PMCID: PMC5973623.

1021 31. Yu HG, Koshland D. Chromosome morphogenesis: condensin-dependent  
1022 cohesin removal during meiosis. *Cell*. 2005;123(3):397-407. Epub  
1023 2005/11/05. doi: 10.1016/j.cell.2005.09.014. PubMed PMID: 16269332.

1024 32. Lee BH, Amon A. Role of Polo-like kinase CDC5 in programming meiosis I  
1025 chromosome segregation. *Science*. 2003;300(5618):482-6. Epub  
1026 2003/03/29. doi: 10.1126/science.1081846. PubMed PMID: 12663816.

1027 33. Sym M, Engebrecht JA, Roeder GS. ZIP1 is a synaptonemal complex  
1028 protein required for meiotic chromosome synapsis. *Cell*. 1993;72(3):365-78.  
1029 PubMed PMID: 7916652.

1030 34. Gladstone MN, Obeso D, Chuong H, Dawson DS. The synaptonemal

1031 complex protein Zip1 promotes bi-orientation of centromeres at meiosis I.  
1032 PLoS Genetics. 2009;5(12):e1000771. Epub 2009/12/17. doi:  
1033 10.1371/journal.pgen.1000771. PubMed PMID: 20011112; PubMed Central  
1034 PMCID: PMCPMC2781170.

1035 35. Rockmill B, Roeder GS. *RED1*: a yeast gene required for the segregation of  
1036 chromosomes during the reductional division of meiosis. Proc Natl Acad Sci  
1037 U S A. 1988;85(16):6057-61. Epub 1988/08/01. PubMed PMID: 3413075;  
1038 PubMed Central PMCID: PMCPMC281904.

1039 36. Xu L, Ajimura M, Padmore R, Klein C, Kleckner N. *NDT80*, a  
1040 meiosis-specific gene required for exit from pachytene in *Saccharomyces*  
1041 *cerevisiae*. Mol Cell Biol. 1995;15(12):6572-81. Epub 1995/12/01. PubMed  
1042 PMID: 8524222; PubMed Central PMCID: PMC230910.

1043 37. Buonomo SB, Clyne RK, Fuchs J, Loidl J, Uhlmann F, Nasmyth K.  
1044 Disjunction of homologous chromosomes in meiosis I depends on  
1045 proteolytic cleavage of the meiotic cohesin Rec8 by separin. Cell.  
1046 2000;103(3):387-98. Epub 2000/11/18. PubMed PMID: 11081626.

1047 38. Brar GA, Hochwagen A, Ee LS, Amon A. The multiple roles of cohesin in  
1048 meiotic chromosome morphogenesis and pairing. Mol Biol Cell.  
1049 2009;20(3):1030-47. Epub 2008/12/17. doi: 10.1091/mbc.E08-06-0637.  
1050 PubMed PMID: 19073884; PubMed Central PMCID: PMCPMC2633386.

1051 39. Clyne RK, Katis VL, Jessop L, Benjamin KR, Herskowitz I, Lichten M, et al.  
1052 Polo-like kinase Cdc5 promotes chiasmata formation and cosegregation of  
1053 sister centromeres at meiosis I. Nat Cell Biol. 2003;5(5):480-5. Epub  
1054 2003/04/30. doi: 10.1038/ncb977. PubMed PMID: 12717442.

1055 40. Challa K, Lee MS, Shinohara M, Kim KP, Shinohara A. Rad61/Wpl1 (Wapl),  
1056 a cohesin regulator, controls chromosome compaction during meiosis.  
1057 Nucleic Acids Res. 2016;44(7):3190-203. Epub 2016/01/31. doi:  
1058 10.1093/nar/gkw034. PubMed PMID: 26825462; PubMed Central PMCID:  
1059 PMCPMC4838362.

1060 41. Montagnoli A, Valsasina B, Brotherton D, Troiani S, Rainoldi S, Tenca P, et al.  
1061 Identification of Mcm2 phosphorylation sites by S-phase-regulating kinases.  
1062 J Biol Chem. 2006;281(15):10281-90. Epub 2006/02/01. doi:  
1063 10.1074/jbc.M512921200. PubMed PMID: 16446360.

- 1064 42. Michaelis C, Ciosk R, Nasmyth K. Cohesins: chromosomal proteins that  
1065 prevent premature separation of sister chromatids. *Cell*. 1997;91(1):35-45.  
1066 Epub 1997/10/23. PubMed PMID: 9335333.
- 1067 43. Rogers E, Bishop JD, Waddle JA, Schumacher JM, Lin R. The aurora kinase  
1068 AIR-2 functions in the release of chromosome cohesion in *Caenorhabditis*  
1069 *elegans* meiosis. *J Cell Biol*. 2002;157(2):219-29. Epub 2002/04/10. doi:  
1070 10.1083/jcb.200110045. PubMed PMID: 11940606; PubMed Central  
1071 PMCID: PMCPMC1855215.
- 1072 44. Crawley O, Barroso C, Testori S, Ferrandiz N, Silva N, Castellano-Pozo M,  
1073 et al. Cohesin-interacting protein WAPL-1 regulates meiotic chromosome  
1074 structure and cohesion by antagonizing specific cohesin complexes. *Elife*.  
1075 2016;5:e10851. Epub 2016/02/05. doi: 10.7554/eLife.10851. PubMed PMID:  
1076 26841696; PubMed Central PMCID: PMCPMC4758955.
- 1077 45. De K, Sterle L, Krueger L, Yang X, Makaroff CA. *Arabidopsis thaliana* WAPL  
1078 is essential for the prophase removal of cohesin during meiosis. *PLoS*  
1079 *Genetics*. 2014;10(7):e1004497. Epub 2014/07/18. doi:  
1080 10.1371/journal.pgen.1004497. PubMed PMID: 25033056; PubMed Central  
1081 PMCID: PMCPMC4102442.
- 1082 46. McNicoll F, Stevense M, Jessberger R. Cohesin in gametogenesis. *Current*  
1083 *topics in developmental biology*. 2013;102:1-34. Epub 2013/01/05. doi:  
1084 10.1016/b978-0-12-416024-8.00001-5. PubMed PMID: 23287028.
- 1085 47. Brieno-Enriquez MA, Moak SL, Toledo M, Filter JJ, Gray S, Barbero JL, et al.  
1086 Cohesin Removal along the Chromosome Arms during the First Meiotic  
1087 Division Depends on a NEK1-PP1gamma-WAPL Axis in the Mouse. *Cell*  
1088 *Rep*. 2016;17(4):977-86. Epub 2016/10/21. doi:  
1089 10.1016/j.celrep.2016.09.059. PubMed PMID: 27760328; PubMed Central  
1090 PMCID: PMCPMC5123770.
- 1091 48. Kleckner N. Chiasma formation: chromatin/axis interplay and the role(s) of  
1092 the synaptonemal complex. *Chromosoma*. 2006;115(3):175-94. PubMed  
1093 PMID: 16555016.
- 1094 49. Zickler D, Kleckner N. Meiotic chromosomes: integrating structure and  
1095 function. *Annu Rev Genet*. 1999;33:603-754. PubMed PMID: 10690419.
- 1096 50. Jin H, Guacci V, Yu HG. Pds5 is required for homologue pairing and inhibits



1097       synapsis of sister chromatids during yeast meiosis. *J Cell Biol.*  
1098       2009;186(5):713-25. Epub 2009/09/09. doi: 10.1083/jcb.200810107.  
1099       PubMed PMID: 19736318; PubMed Central PMCID: PMC2742186.

1100   51. Shinohara M, Oh SD, Hunter N, Shinohara A. Crossover assurance and  
1101       crossover interference are distinctly regulated by the ZMM proteins during  
1102       yeast meiosis. *Nat Genet.* 2008;40(3):299-309. PubMed PMID: 18297071.

1103   52. Zhu Z, Mori S, Oshiumi H, Matsuzaki K, Shinohara M, Shinohara A.  
1104       Cyclin-dependent kinase promotes formation of the synaptonemal complex  
1105       in yeast meiosis. *Genes Cells.* 2011;15(10):1036-50. PubMed PMID:  
1106       20825495.

1107   53. Shinohara M, Gasior SL, Bishop DK, Shinohara A. Tid1/Rdh54 promotes  
1108       colocalization of Rad51 and Dmc1 during meiotic recombination. *Proc Natl*  
1109       *Acad Sci U S A.* 2000;97(20):10814-9. PubMed PMID: 11005857.

1110   54. Shinohara M, Sakai K, Ogawa T, Shinohara A. The mitotic DNA damage  
1111       checkpoint proteins Rad17 and Rad24 are required for repair of  
1112       double-strand breaks during meiosis in yeast. *Genetics.* 2003;164(3):855-65.  
1113       Epub 2003/07/23. PubMed PMID: 12871899; PubMed Central PMCID:  
1114       PMC1462628.

1115   55. Kee K, Protacio RU, Arora C, Keeney S. Spatial organization and dynamics  
1116       of the association of Rec102 and Rec104 with meiotic chromosomes. *Embo*  
1117       *J.* 2004;23(8):1815-24. Epub 2004/03/27. doi: 10.1038/sj.emboj.7600184.  
1118       PubMed PMID: 15044957; PubMed Central PMCID: PMC394238.

1119  
1120

# Figure Legends

## Figure 1. Rec8 shows dynamic localization in late meiotic prophase-I

- A.** Immunostaining analysis of Rec8 (red) and axis protein Red1 (green; top) and Rec8 (red) and SC protein Zip1 (green; bottom) in *cdc20-mn* (KSY642/643) strain. Representative image with or without DAPI (blue) dye is shown. Rec8 staining in the *cdc20-mn* was classified as linear (5 h) and altered (8 h) classes. The bar indicates 2  $\mu$ m.
- B.** Kinetics of Rec8 (left), Zip1 (middle) and Red1 (right) staining in *cdc20-mn* (KSY642/643) strain was analyzed. A minimum 100 cells were counted at each time point. Error bars (Rec8) show the standard deviation (S.D.; n=3). Rec8 staining is classified; full (blue) and discontinuous dotted (red) staining. Zip1 staining is classified as follows: dotted (blue); short linear (green); full linear staining (red). Red1 staining is classified as follows; dotted (light blue); short linear (light purple); full linear staining (purple).
- C.** Total signal intensity of Rec8 and DAPI on chromosome spreads at 5 and 8 h was measured in *cdc20-mn* (KSY642/643) cells. A minimum 30 spreads were quantified in representative time points. Error bars show the S.D. (n=3).
- D.** SR-SIM microscopic observation of Rec8 (red) and Ctf19 (green) (left) in *cdc20-mn* (KSY642/643) and *ndt80* (KSY467/468) cells. Representative image with or without DAPI (blue) dye is shown. White insets are shown in a magnified view at right. The bar indicates 2  $\mu$ m.
- E.** Total signal intensity of Rec8 and DAPI on chromosome spreads at 5 and 8 h was measured in *cdc20-mn* (KSY642/643) and *ndt80* (KSY467/468) cells as shown in (C).
- F.** Immunostaining analysis of Rec8 (red) and Red1 (green) in wild type (MSY832/833) cells. Representative image with or without DAPI (blue) dye is shown. Rec8 staining was classified as linear (5 h) and altered (6 h) classes with Red1-positive and -negative, respectively. The bar indicates 2  $\mu$ m.

- 1152 **G.** Kinetics of Rec8- and Red1-positive spreads in wild type (MSY832/833) is  
 1153 shown. A minimum 100 nuclei were quantified in representative time points.  
 1154 Error bars show the S.D. (n=3).
- 1155 **H.** Quantification of total Rec8 and DAPI signal intensity in Red1-positive and  
 1156 Red1-negative spreads in wild type was analyzed as shown in (C).
- 1157 **I.** Localization of Rec8 (red) with or without DAPI (Blue) in *REC8-N* (KSY597)  
 1158 mutants was analyzed and the representative images are shown.
- 1159 **J.** Quantification of total Rec8 and DAPI signal intensity at 5 and 8 h in *REC8-N*  
 1160 (KSY597) was analyzed as shown in (C).

1161 **Figure 2. Rec8 dissociates from meiotic chromosomes at late prophase-I**

- 1162 **A.** Chromatin fractionation assay was carried out using *cdc20-mn*  
 1163 (KSY642/643) and *ndt80* (KSY467/468) mutant cells. Western blotting was  
 1164 performed for whole cell extracts (W), chromatin-unbound fractions (S) and  
 1165 chromatin-bound fraction (P). Rec8 (top) and acetyl-Smc3 (second) were  
 1166 probed together with tubulin (third) and Histone 2B (H2B; bottom) as  
 1167 controls for chromatin-unbound and -bound proteins, respectively. Two  
 1168 major phosphorylated Rec8 bands are indicated with red and green bars on  
 1169 the left.
- 1170 **B.** Quantification of Rec8 band intensity in (A) is shown. Rec8-enrichment to  
 1171 chromatin is expressed as a ratio of Rec8 to H2B levels while the soluble  
 1172 fraction of Rec8 is based on the ratio of Rec8 to tubulin levels. Rec8 level in  
 1173 *cdc20-mn* strain whole cell extracts (W) at 5 h was used to normalize the  
 1174 values. *P*-values were obtained by comparing signal of Rec8 in  
 1175 chromatin-unbound fraction (S) between 5 and 8 h. Error bars show the  
 1176 S.D. (n=3).
- 1177 **C.** Intensity of acetyl-Smc3 shown in (A) was quantified and analyzed as  
 1178 described in (B).
- 1179 **D.** Single culture of *cdc20-mn pCUP-Esp1-9myc* (KSY1009/1010) strain was  
 1180 synchronized and divided into two cultures; then Esp1 expression was  
 1181 induced by addition of 50  $\mu$ M CuSO<sub>4</sub> at 3 and 5 h. Prepared chromosome  
 1182 spreads were immuno-stained for Rec8 (red) and Ctf19 (green).  
 1183 Representative images are shown. The bar indicates 2  $\mu$ m.

- 1184 **E.** Total Rec8 and DAPI signal intensity was quantified as shown in Fig. 1C. A  
 1185 minimum 30 nuclei were quantified in each representative time points. Error  
 1186 bars show the S.D. (n=3).
- 1187 **F.** Chromatin fractionation assay of *cdc20-mn pCUP-Esp1-9myc*  
 1188 (KSY1009/1010) cells without and with overexpression of Esp1 was carried  
 1189 out as shown in (A).
- 1190 **G.** Quantification of Rec8 levels in *cdc20-mn pCUP-ESP1-9myc*  
 1191 (KSY1009/1010) strain was analyzed as shown in (B). Whole cell extracts  
 1192 (W) at 5 h sample was used for normalization.

1193 **Figure 3. Rec8 phosphorylation is required for efficient dissociation of**  
 1194 **Rec8 at late prophase-I**

- 1195 **A.** Chromatin fractionation assay for *cdc20-mn* (KSY642/643) and *cdc20-mn*  
 1196 *cdc5-mn* (KSY659/660) mutant cells was carried out as described in Fig. 2A.
- 1197 **B.** Quantification of Rec8 band intensity in (A) is performed as shown in Fig.  
 1198 2B. Error bars show the S.D. (n=3).
- 1199 **C.** Localization of Rec8 (red) and Rec8-pS521 (phospho-S521; green) was  
 1200 analyzed in *cdc20-mn* (KSY642/643) *cdc20-mn cdc5-mn* (KSY659/660)  
 1201 cells at 5, 8 and 12 h.
- 1202 **D.** Total Rec8, Rec8-pS521, and DAPI signal intensity was studied as in Fig.  
 1203 1C. Error bars show the S.D. (n=3).
- 1204 **E.** Localization of Rec8 (red) with or without DAPI (blue) in *CDC20-mn*  
 1205 (KSY642/643) and *CDC20-mn CDC5-mn* (KSY659/660) mutants.  
 1206 Representative image is shown. The bar indicates 2  $\mu$ m.
- 1207 **F.** Kinetics of Rec8 in (E) was classified as shown in Fig. 1B. Error bars show  
 1208 the S.D. (n=3).
- 1209 **G.** Total Rec8 and DAPI signal intensity was quantified as shown in Fig. 1C. A  
 1210 minimum 30 nuclei were quantified in each representative time points. Error  
 1211 bars show the S.D. (n=3).

1212

1213 **Figure 4. Rec8 phosphorylation is critical for cleavage-independent Rec8**  
 1214 **dissociation from meiotic chromosomes**

- 1215 **A.** Localization of Rec8 (red) and Red1 (green) on chromosome spreads was  
1216 analyzed for *CDC20-mn* (KSY642/643) and *CDC20-mn rec8-29A*  
1217 (KSY866/867) cells. Representative image with or without DAPI (blue) dye is  
1218 shown. The bar indicates 2  $\mu$ m.
- 1219 **B.** Kinetics of Rec8 and Red1 staining classes in (A) was analyzed as in Fig.  
1220 1B. A minimum 100 cells were analyzed at each time point. Error bars show  
1221 the S.D. (n=3).
- 1222 **C.** Localization of Rec8 (red) and Zip1 (green) spreads was studied in  
1223 *CDC20-mn* (KSY642/643) and *CDC20-mn rec8-29A* (KSY866/867).
- 1224 **D.** Kinetics of Zip1 staining in (F) was classified shown as in Fig. 1B. Error bars  
1225 show the variation from two independent experiments.
- 1226 **E.** Kinetics of Rec8 (left) in (E) was analyzed as in Fig. 1B.
- 1227 **F.** Total Rec8 and DAPI signal intensity was quantified as described in Fig. 1C.  
1228 Error bars show the S.D. (n=3).

1229 **Figure 5. Cdc5 is sufficient for cleavage-independent Rec8 dissociation**  
1230 **from meiotic chromosomes**

- 1231 **A.** Localization of Rec8 (red) with or without DAPI (blue) in *ndt80* (KSY467/468),  
1232 *ndt80 GALp-CDC5 GAL4-DB-ER* without estradiol induction (-ER)  
1233 (KSY887/888), *ndt80 GALp-CDC5-N209A GAL4-DB-ER* with estradiol  
1234 induction (+ER) (KSY882/883) and *ndt80 GALp-CDC5 GAL4-DB-ER* (-ER)  
1235 (KSY887/888) cells is shown. *CDC5* overexpression was induced by the  
1236 addition of 400 nM Estradiol at 2 h.
- 1237 **B.** Kinetics of Rec8 classes in (A) was classified shown in Fig. 1B. A minimum  
1238 100 cells were counted at each time point.
- 1239 **C.** Expression profiles of Cdc5 during meiosis were verified by western blotting  
1240 in *ndt80* (KSY467/468), *ndt80 Galp-CDC5 GAL4-DB-ER* without estradiol  
1241 induction (-ER) (KSY887/888), *ndt80 GALp-CDC5-N209A GAL4-DB-ER* with  
1242 estradiol induction (+ER) (KSY882/883) and *ndt80 GALp-CDC5*  
1243 *GAL4-DB-ER* (-ER) (KSY887/888) cells is shown. *CDC5* overexpression was  
1244 induced by the addition of 400 nM Estradiol at 2 h. At each time point of  
1245 meiosis, cells were fixed with trichloroacetic acid (TCA), and cell lysates were

1246 examined. Tubulin used was utilized as a loading control. The protein  
1247 positions are indicated with the lines on the right.

1248 **D.** Representative images of *CEN4* and *TEL4* GFP foci (green) and nuclei  
1249 (blue) in *cdc20-mn* (KSY991/642), *ndt80* (KSY445/467) and *cdc20-mn*  
1250 *CDC5-mn* (KSY989/659) cells in a single focal plane of whole cell staining at  
1251 each time point are shown. The bar indicates 2µm.

1252 **E.** Distances between *CEN4* and *TEL4* at each time point 0h, 5h, and 8h  
1253 (*cdc20-mn*; KSY991/642 and *ndt80*; KSY445/467) as well as at 10 h in  
1254 *cdc20-mn CDC5-mn* (KSY989/659) were measured and plotted as a  
1255 box/whisker plot. A minimum 100 nuclei were studied in each time point.

1256

# 1257 **Figure 6. Rad61/Wpl1 plays a role in cohesin-release in late prophase-I.**

1258 **A.** Localization of Rec8 (red) and Ctf19 (green) in *cdc20-mn* (KSY642/643),  
1259 *cdc20-mn rad61* (KSY637/638), *cdc20-mn rad61-7A* (KSY653/654) and  
1260 *cdc20-mn rec8-29A rad61-7A* (KSY1043/1044) cells. Representative image  
1261 for each strain at various time points are shown.

1262 **B.** Measurement of total Rec8 and DAPI signal intensity in (a) was analyzed in  
1263 Fig.1C. Error bars show the S.D. (n=3).

1264 **C.** Kinetics of Rec8-classes was studied as described in Fig. 1B. A minimum  
1265 100 cells were analyzed per time point. Error bars show the S.D. (n=3).

1266 **D.** Expression profiles of Rec8 and Rad61-Flag during meiosis were verified  
1267 using *RAD61-FLAG* (KSY440/441), *cdc5-mn RAD61-FLAG* (KSY434/435),  
1268 *rec8 RAD61-FLAG* (KSY627/628) and *rec8 cdc5-mn RAD61-FLAG*  
1269 (KSY1092/1093) cells by western blotting. The protein positions are  
1270 indicated with the lines on the right. The positions of Rec8 and Rad61-Flag  
1271 are shown by bars. Black bars indicate non-phosphorylated Rad61 or Rec8.  
1272 Red and green bars are DDK-dependent and PLK/Cdc5-dependent  
1273 phosphorylated Rad61 or Rec8, respectively. Bands shifts of Rec8 and  
1274 Rad61 were analyzed in presence and absence of 1NM-PP1 in  
1275 *RAD61-FLAG* (KSY440/441) and *cdc7-as3 RAD61-FLAG* (KSY978/979)  
1276 strains at the indicated time points by western blotting as shown in (D).  
1277 1NM-PP1 was added at 0 h in three cases and washed out at 5 in the right  
1278 panel.

1279 **E.** The western blotting analysis was carried out for Rad61-Flag (Right) and  
 1280 Rad61-pS69, 70 (left) in *RAD61-FLAG* (KSY440/441), *rad61-S69A*,  
 1281 *S70A-FLAG* (KSY754/757) and *rad61-7A-FLAG* (KSY753/755) strains as  
 1282 shown in (D).

1283

1284 **Figure 7. A model for meiotic prophase-like pathway at late prophase-I**

1285 Top, three step removal of cohesin during meiosis of the budding yeast. Bottom,  
 1286 possible model of cohesin release during late prophase-I by phosphorylation of  
 1287 Rec8 and Rad61, which may trigger the opening of the exit gate between Smc3  
 1288 head and Rec8.

1289



# Challa et al. Figure 1

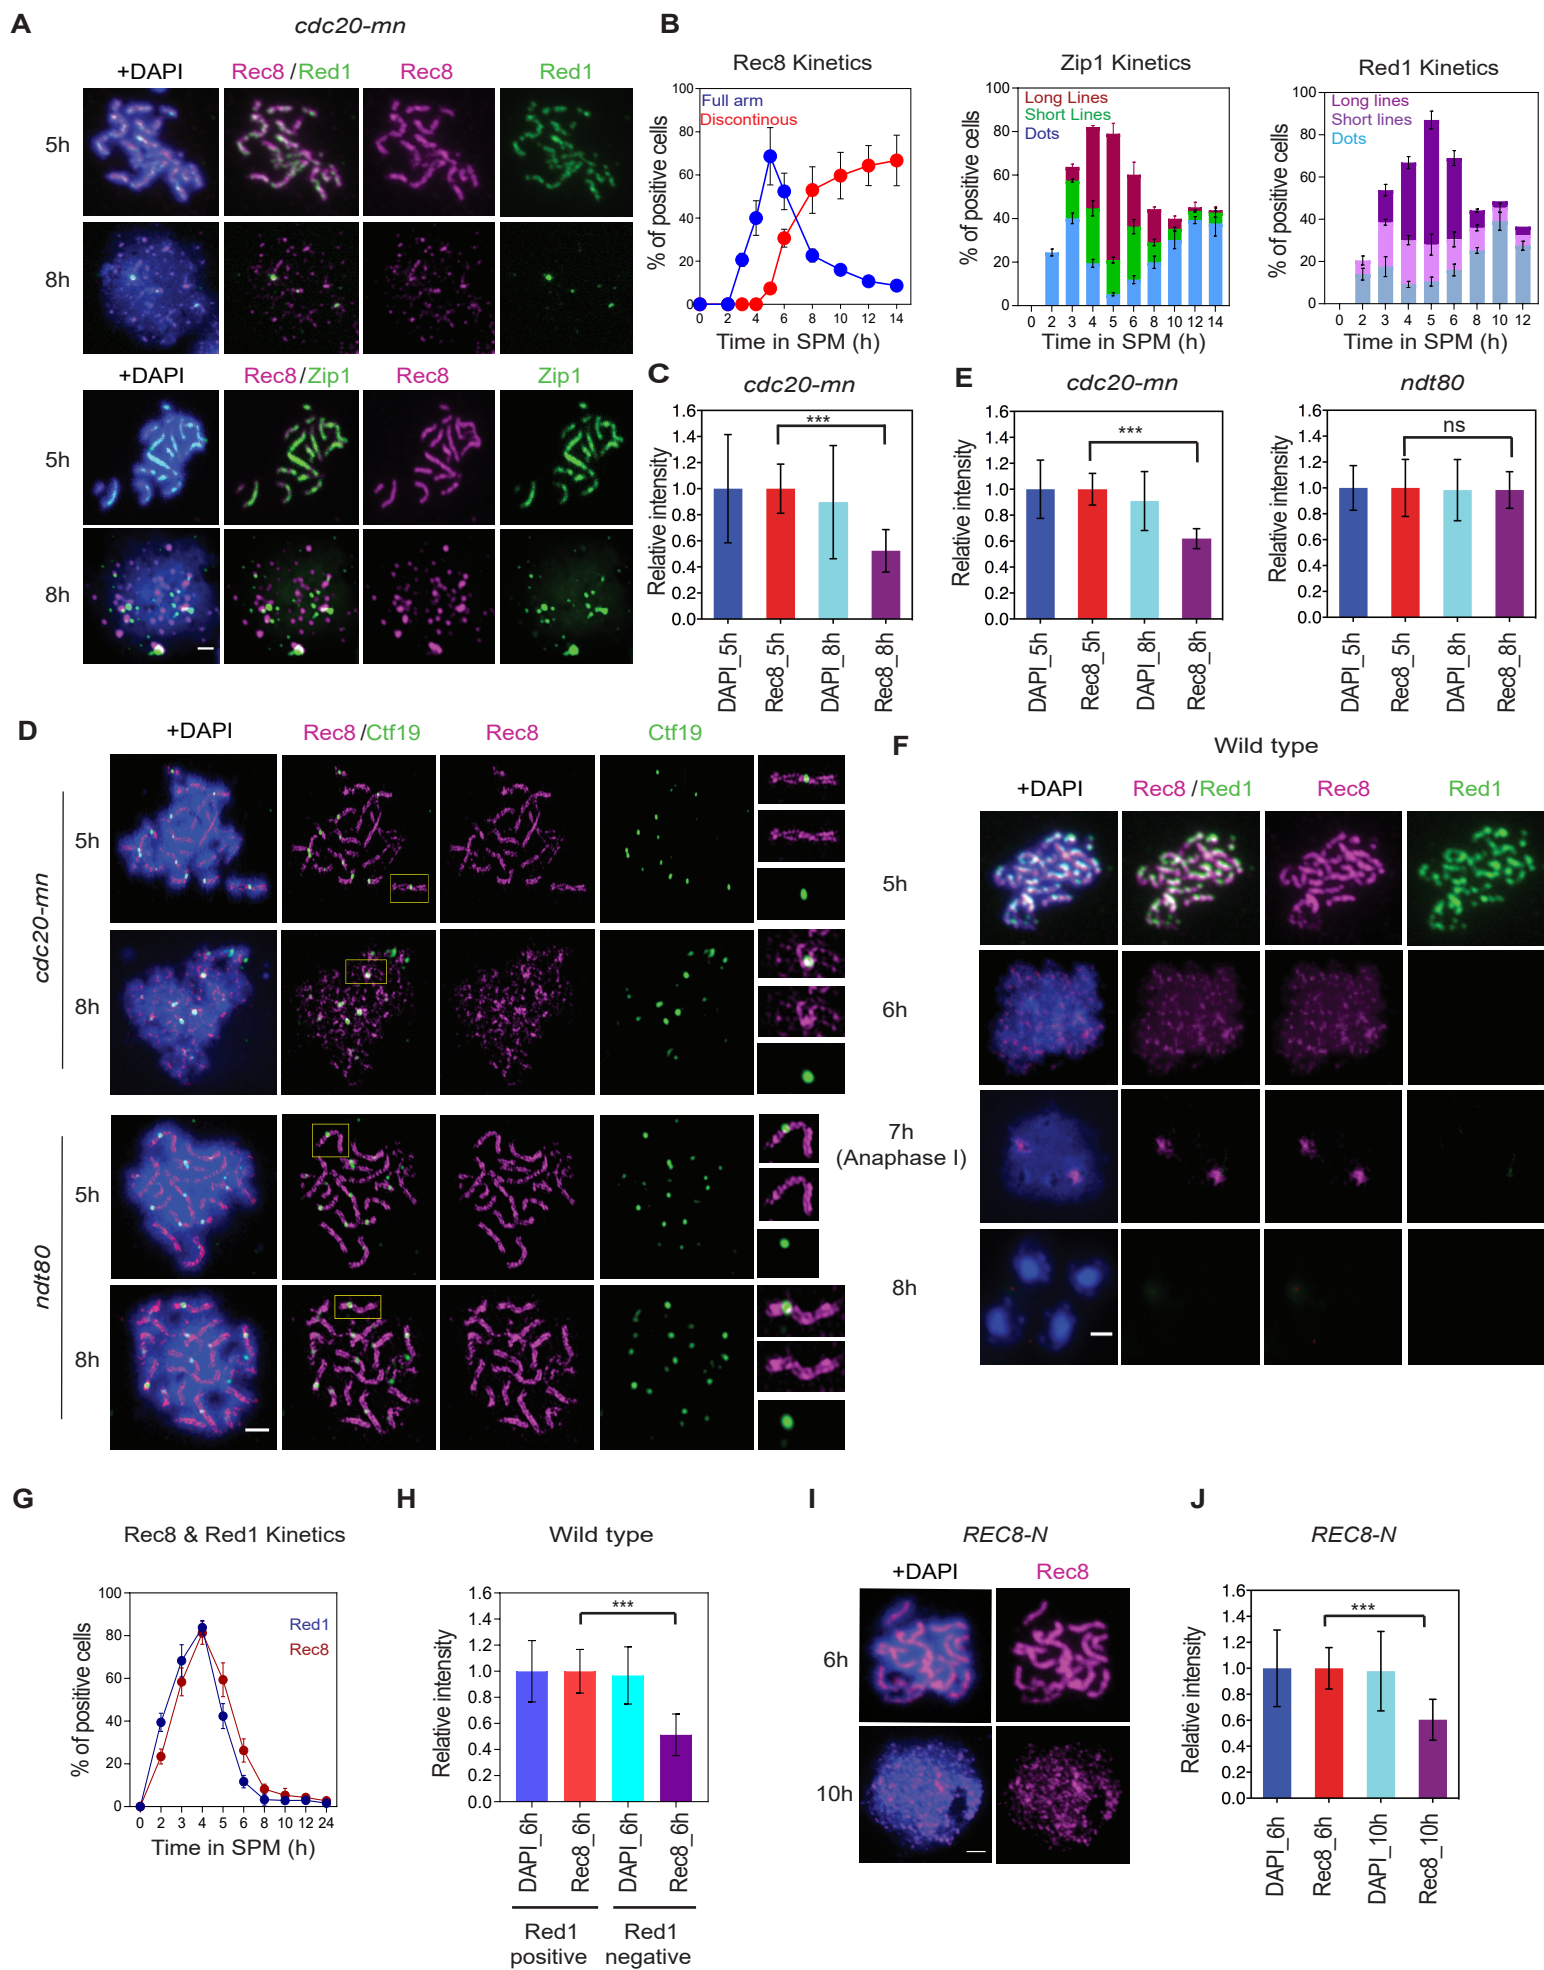

## Challa et al. Figure 2

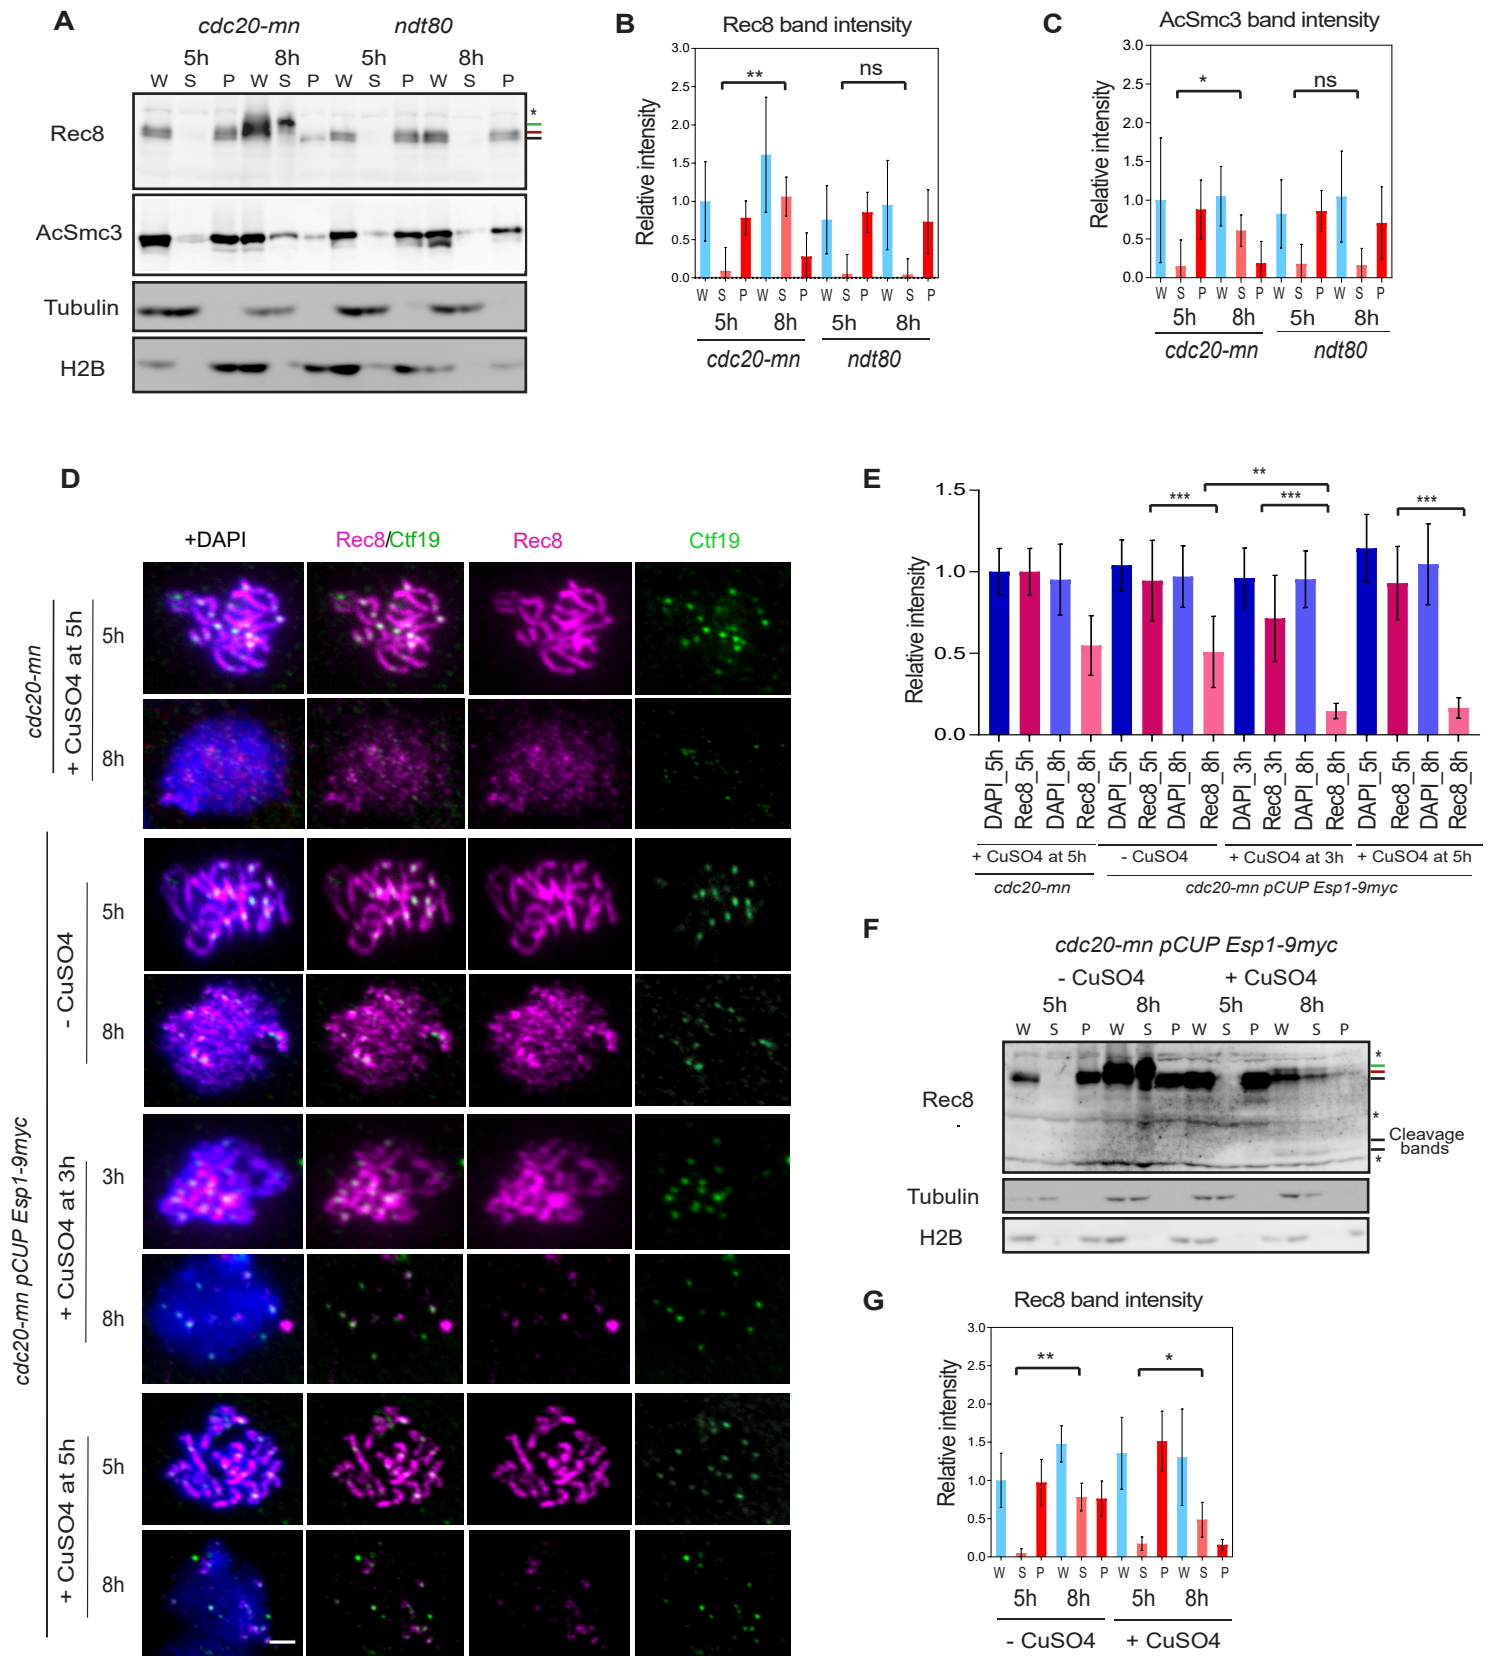

# Challa et al. Figure 3

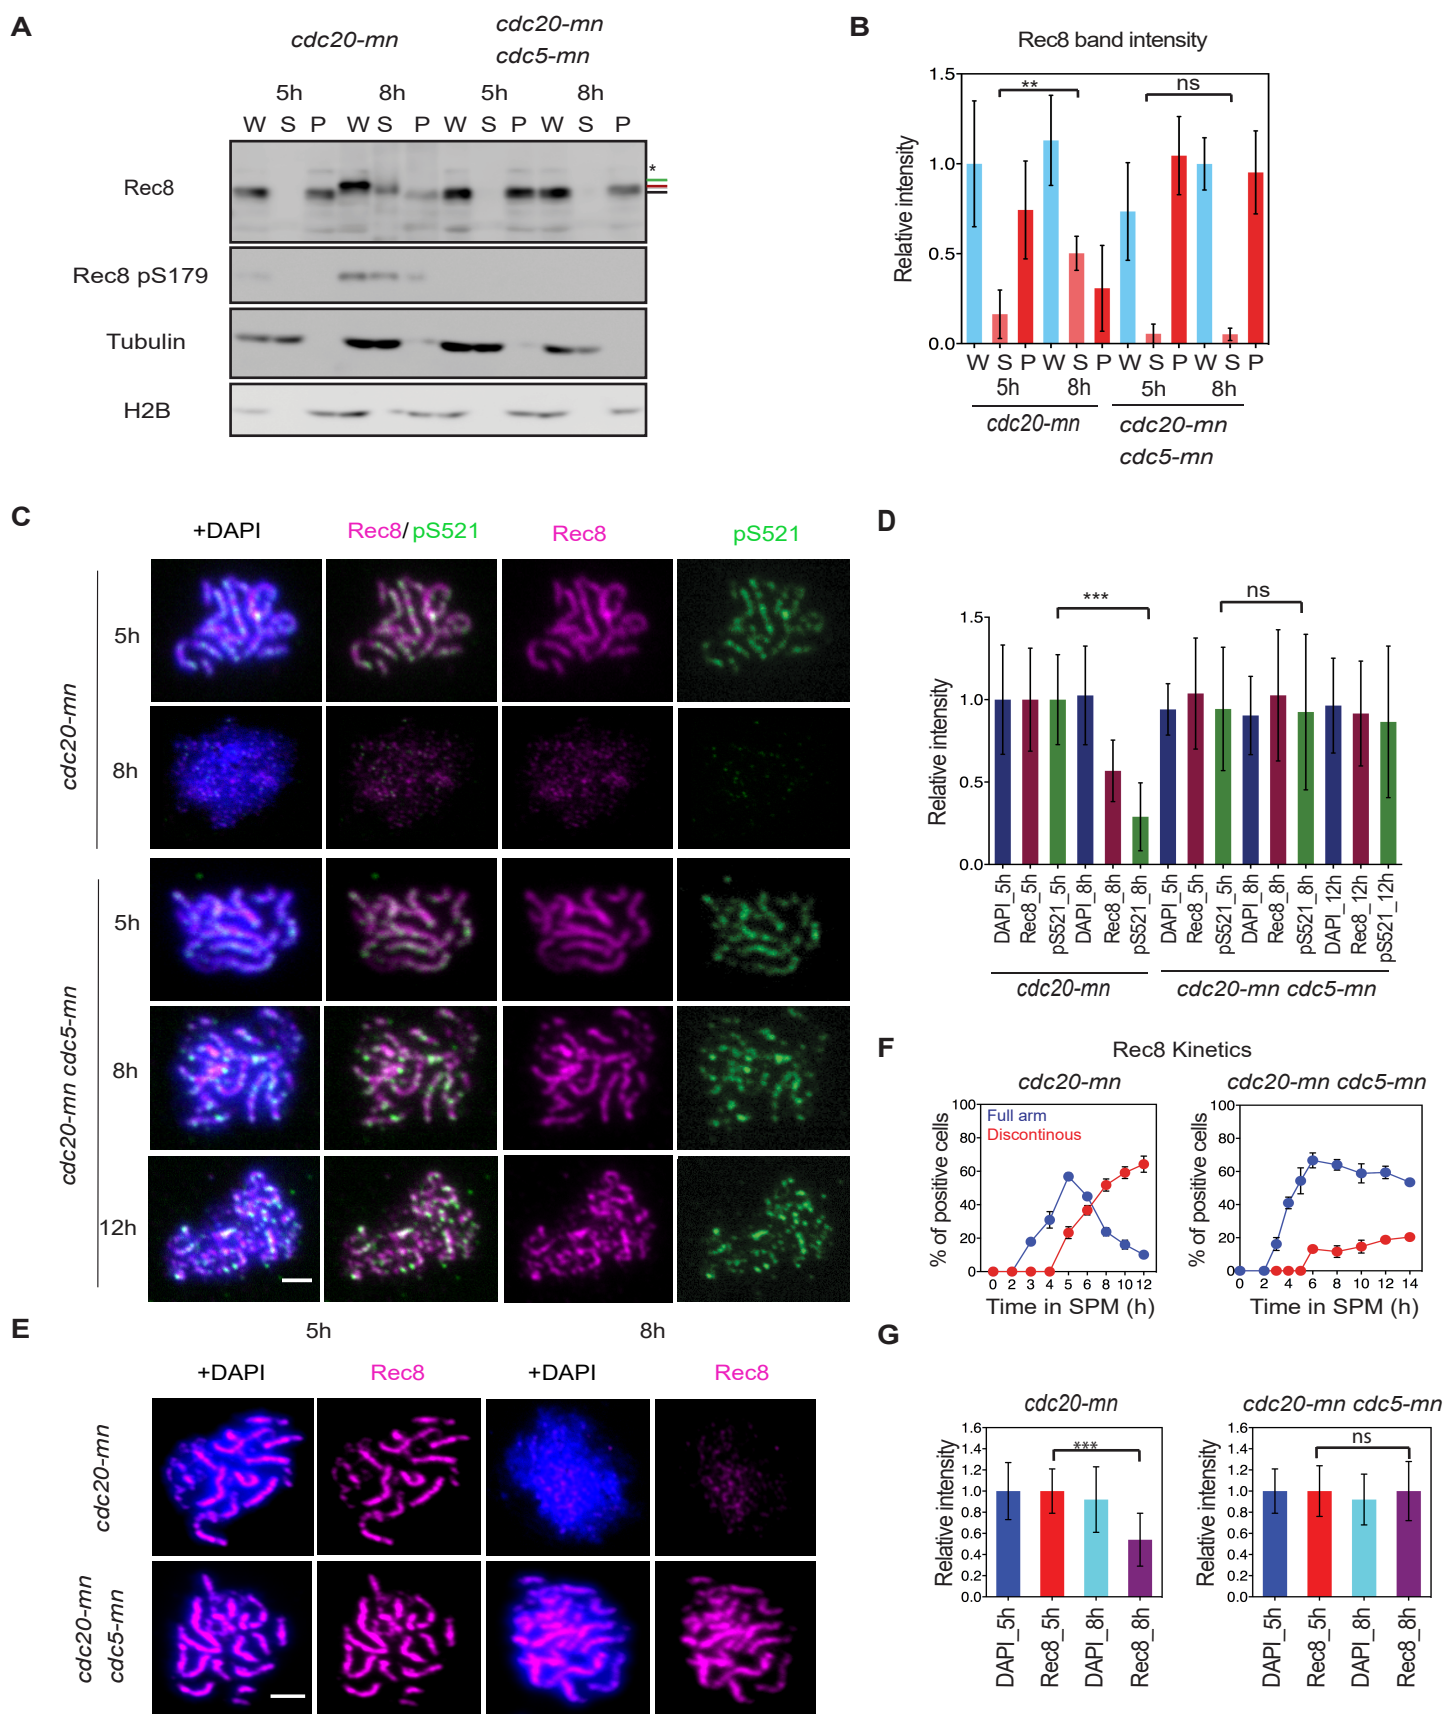



# Challa et al. Figure 4

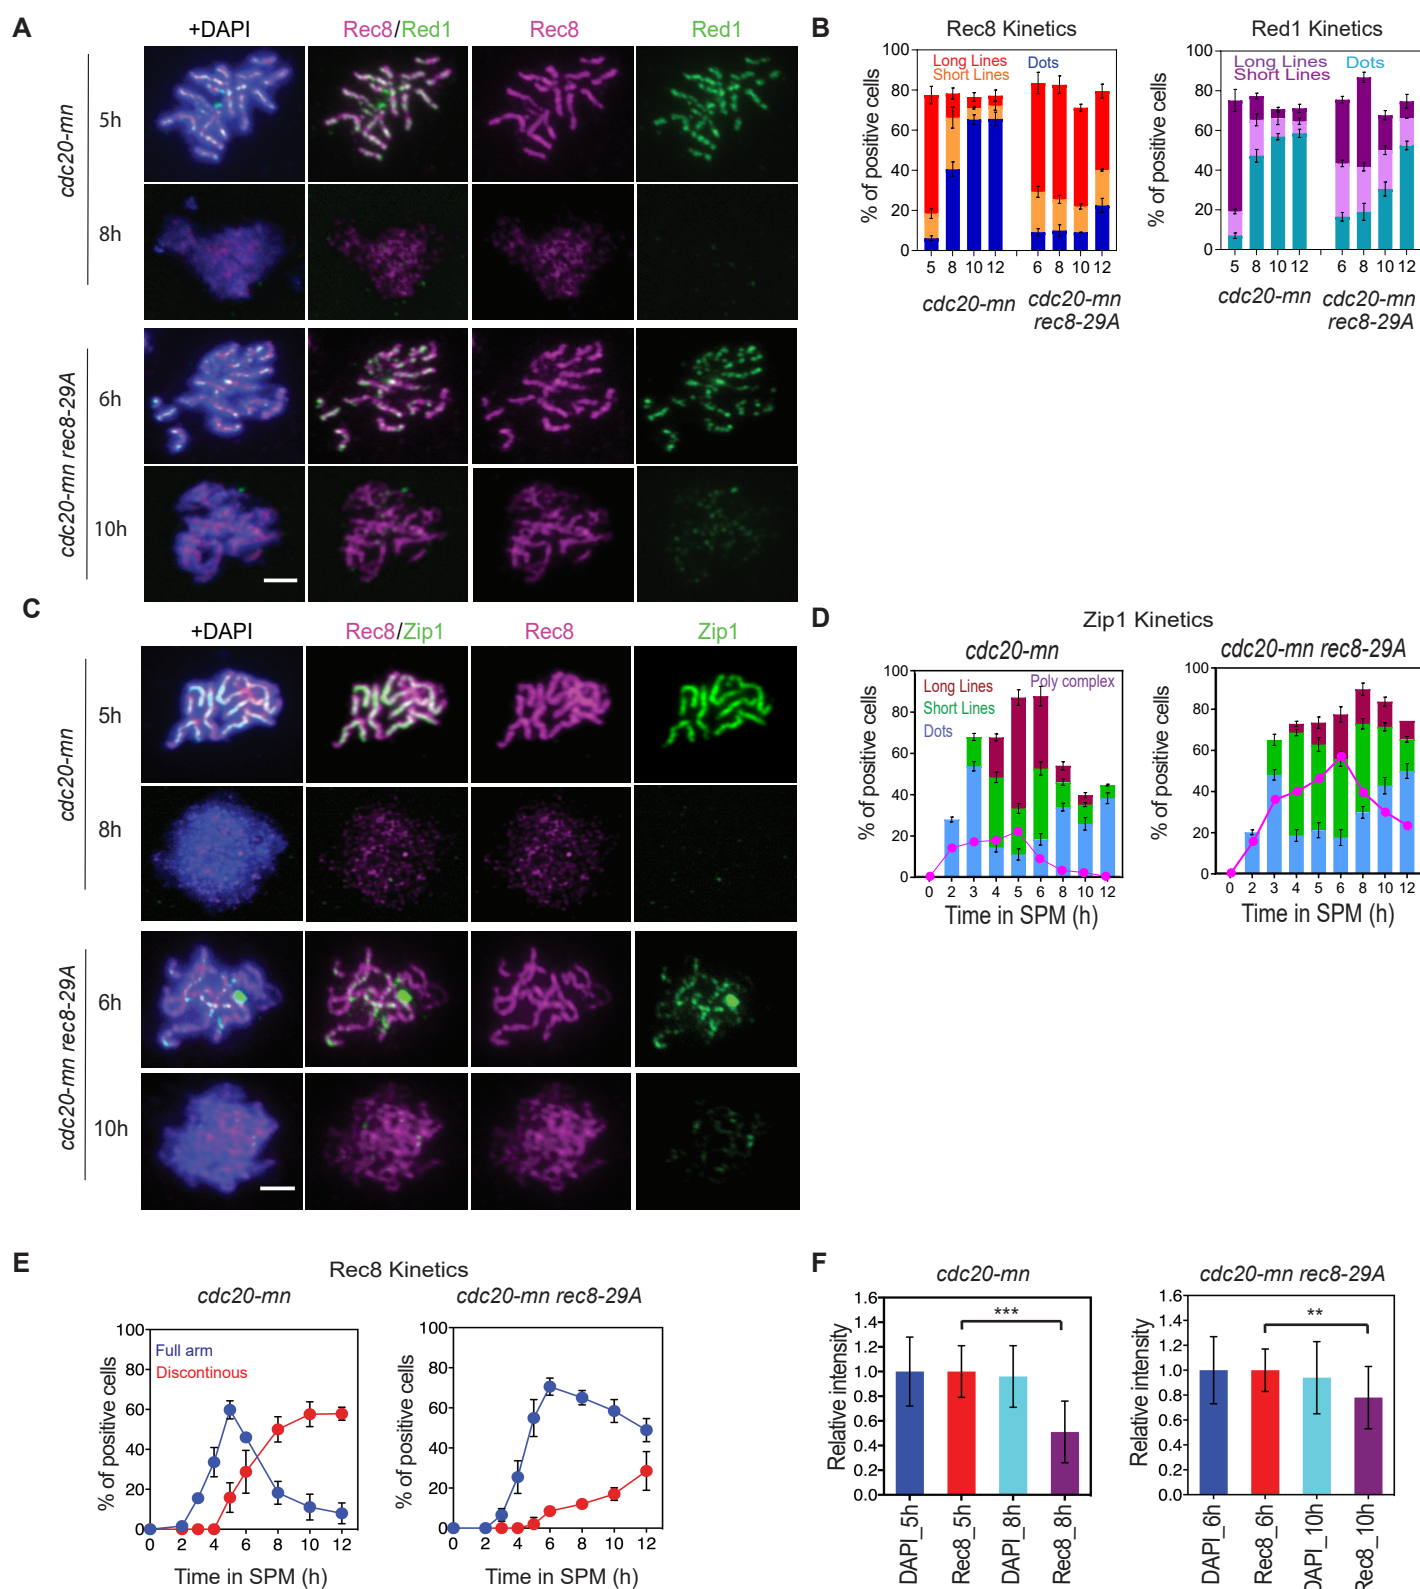

A

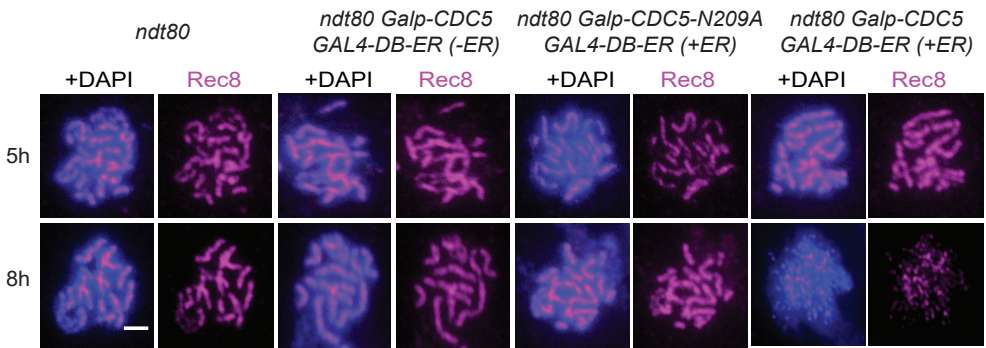

B

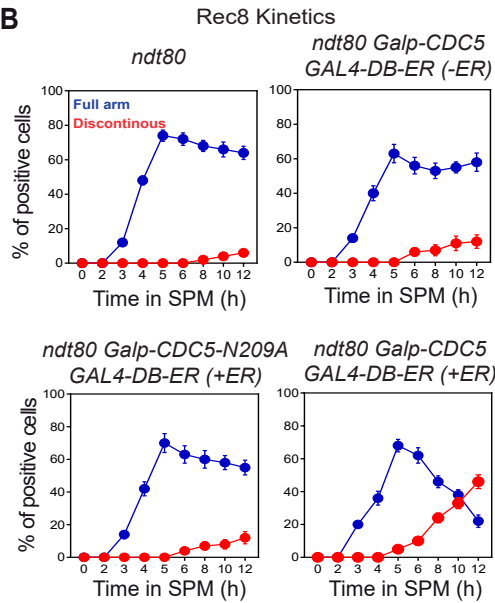

C

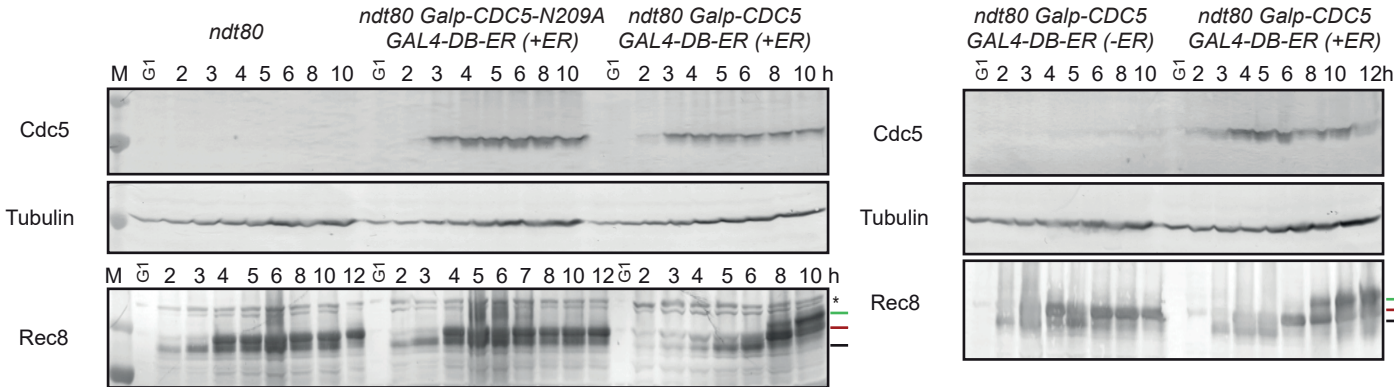

D

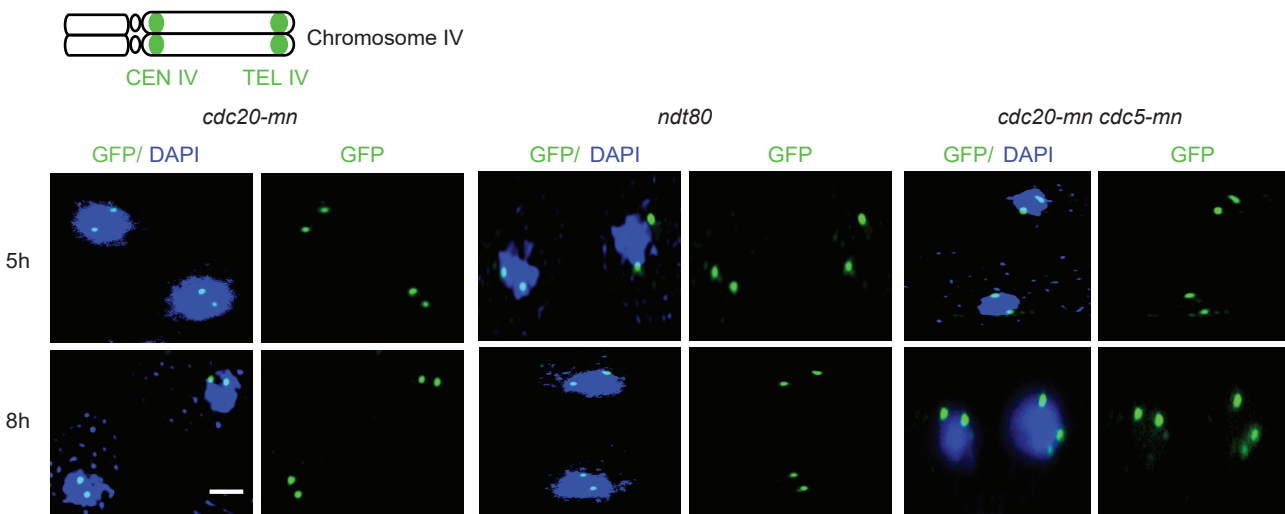

E

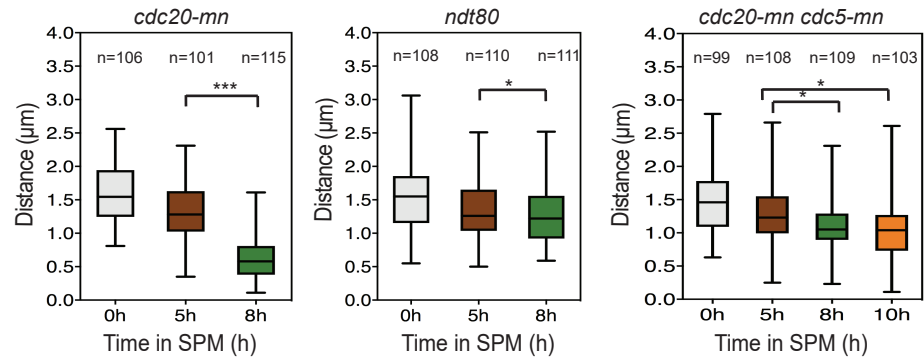

# Challa et al. Figure 6

**A**

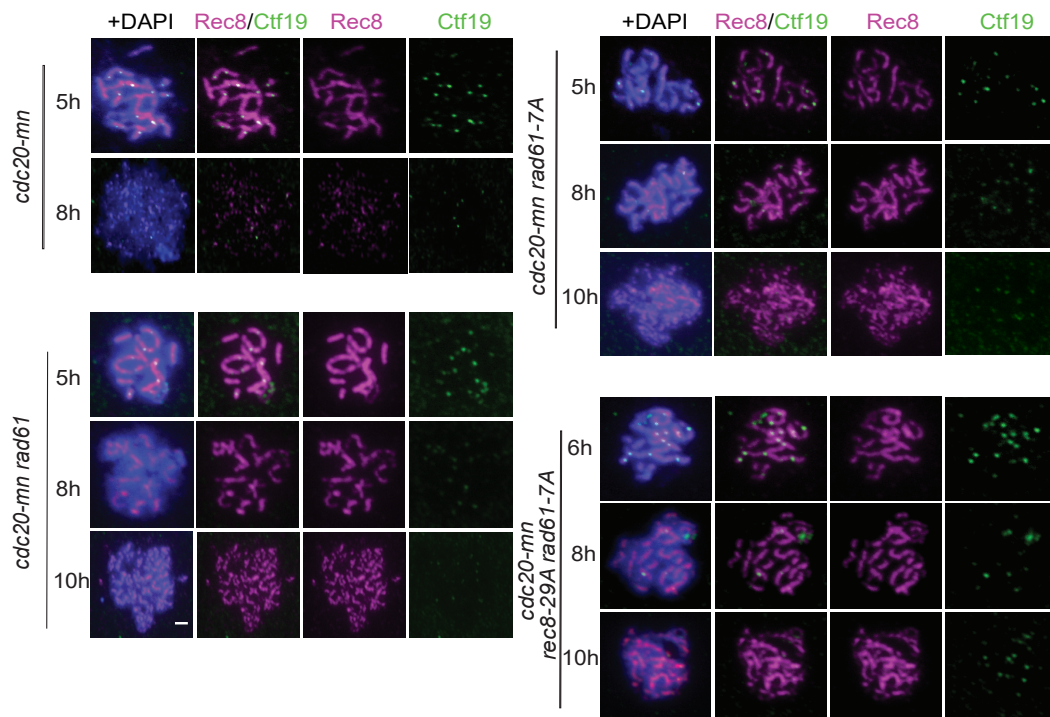

**B**

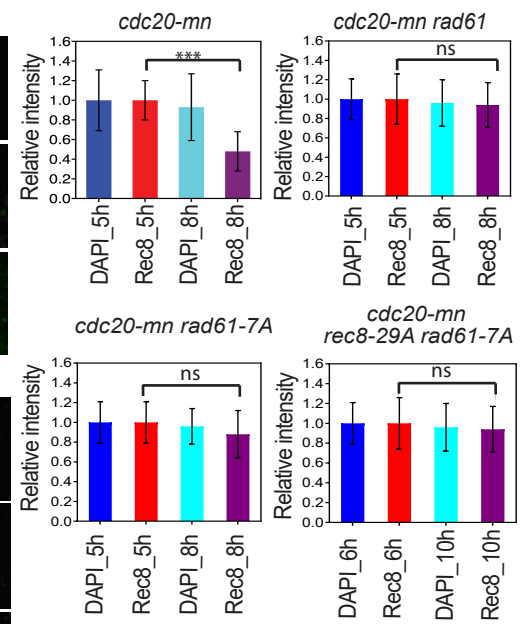

**C**

Rec8 Kinetics

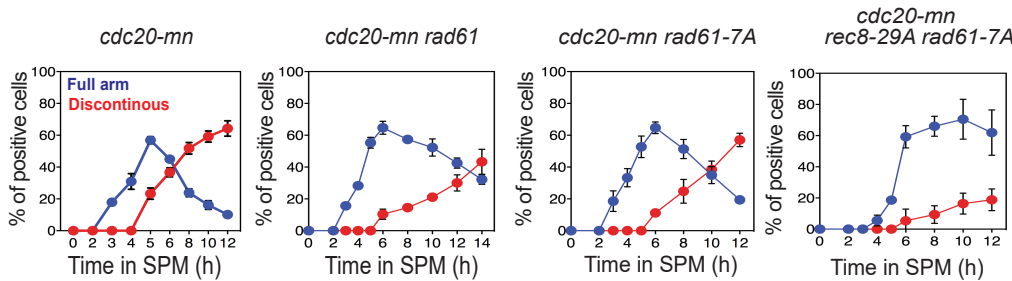

**D**

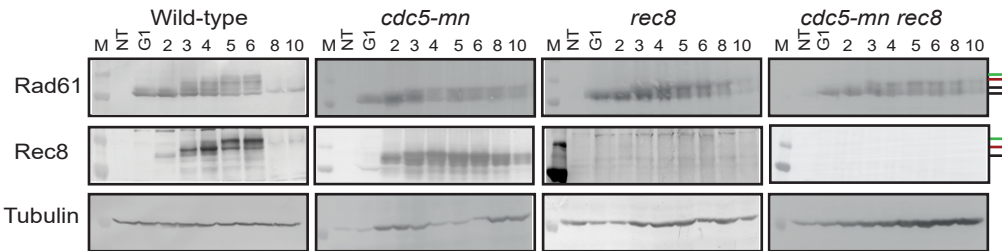

**E**

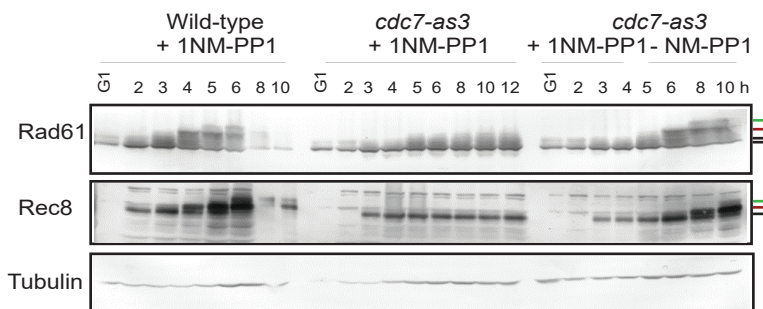

**F**

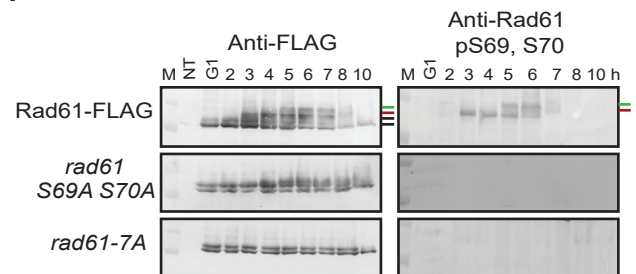

Challa et al. Figure 7

Pachytenema

Diplotenema

Diakinesis

Metaphase-I

cleavage independent

Cleavage dependent

DDK, PLK-dep.  
Rec8 & Rad61 phosphorylation

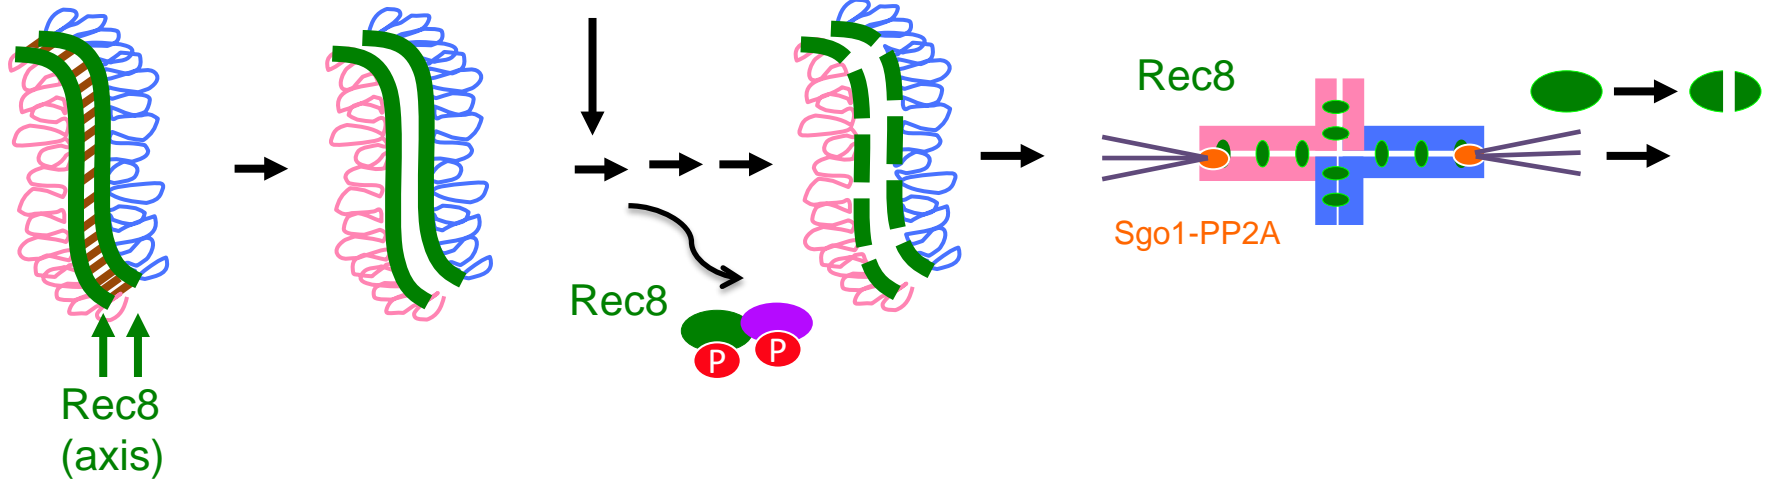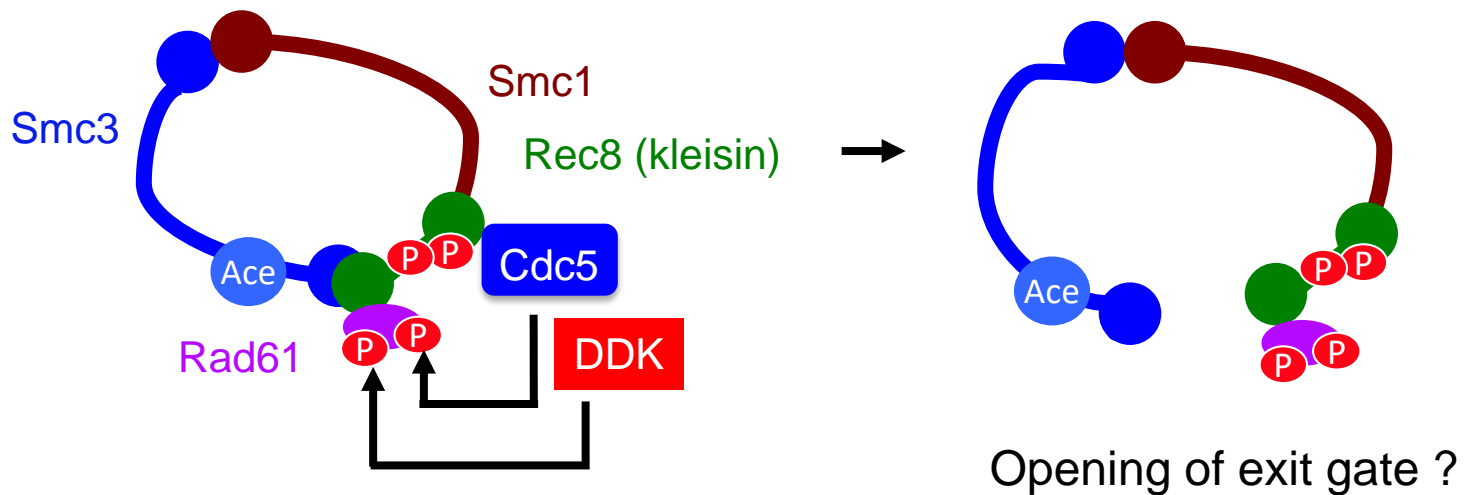

Source: http://biorxiv.org/content/10.1101/250589v3.full.pdf
